# Supplementary material for: Old African fossils provide new evidence for the origin of the American crocodiles
Source: PubMed Central journal article supplement (PMC7378212; doi:10.1038/s41598-020-68482-5), 2020-07-23
Supplement: 41598_2020_68482_MOESM1_ESM.pdf [file 41598_2020_68482_MOESM1_ESM.pdf]

# Supplementary Data File

## Old African fossils provide new evidence for the origin of the American crocodiles

Massimo Delfino, Dawid A. Iurino, Bruno Mercurio, Paolo Piras, Lorenzo Rook & Raffaele Sardella

### Matrix Brochu & Storrs with *C. checchiae* Libya only

|                           |   |   |   |   |   |   |   |   |   |   |   |   |   |
|---------------------------|---|---|---|---|---|---|---|---|---|---|---|---|---|
| Borealosuchus sternbergii | 0 | 0 | 0 | 0 | 0 | 0 | 0 | 0 | 0 | 0 | 0 | 0 | ? |
| 1                         | 1 | 0 | 0 | 1 | 0 | ? | 1 | 0 | 0 | 1 | 0 | 0 |   |
| 0                         | 0 | 0 | 0 | 1 | 0 | 1 | 0 | 0 | 0 | 0 | 0 | 0 | 1 |
| ?                         | 0 | 0 | ? | ? | ? | 0 | ? | ? | ? | 0 | 1 | 1 |   |
| 0                         | 2 | 0 | 0 | 0 | 0 | 0 | 0 | 0 | ? | 0 | 0 | 0 | 0 |
| 2                         | 0 | 0 | 0 | 0 | 0 | 0 | 0 | 1 | 0 | 0 | 0 | 0 | 0 |
| 0                         | ? | ? | 0 | 0 | 0 | 2 | 0 | ? | 0 | 0 | 0 | 0 | 0 |
| 0                         | 0 | 0 | 1 | 3 | 1 | 0 | 0 | 0 | 1 | 0 | 0 | 0 | 0 |
| 1                         | 0 | 0 | 0 | 0 | 0 | 1 | ? | 0 | ? | 0 | 0 | 0 | 0 |
| 0                         | 0 | 1 | 1 | 1 | 0 | 1 | 0 | 0 | 0 | 1 | 0 | 1 |   |
| 0                         | 0 | 0 | 0 | 0 | 1 | 1 | 1 | 1 | 0 | 0 | ? | 0 |   |
| 0                         | 0 | 1 | 0 | 0 | ? | 0 | 0 | 0 | 0 | 0 | 0 | 1 |   |
| 0                         | 0 | 1 | 0 | 1 | 0 | 0 | 0 | 0 | 0 | 0 | ? | 1 |   |
| ?                         | 0 | 0 | 1 | 0 | 0 | 1 | 1 | 0 | 0 | 0 | 0 | 0 | 0 |
| 0                         | 0 | ? | ? | ? | 0 | 0 | 0 | 0 | 1 |   |   |   |   |
| Leidyosuchus canadensis   | ? | ? | ? | ? | 0 | ? | 0 | ? | ? | ? | ? | ? |   |
| ?                         | ? | ? | ? | 1 | ? | ? | ? | ? | 0 | 1 | 0 | 0 |   |
| 0                         | 0 | 0 | 1 | 1 | ? | 1 | ? | ? | 1 | 0 | ? | 0 |   |
| ?                         | 1 | 1 | ? | ? | 1 | 1 | ? | ? | ? | 0 | 1 | 1 |   |
| 0                         | ? | 0 | 0 | 0 | 0 | 0 | ? | 0 | ? | 0 | 1 | ? |   |
| 2                         | 0 | 0 | 0 | 0 | 0 | 0 | 1 | 1 | 1 | 0 | 1 | ? |   |
| ?                         | ? | ? | 0 | 0 | 0 | 1 | 0 | ? | 0 | 0 | 0 | 0 |   |
| 0                         | 0 | 0 | 0 | 3 | 0 | 0 | 0 | 0 | 1 | 0 | 0 | 0 |   |
| 0                         | 0 | 1 | 0 | 0 | 0 | 1 | 0 | 0 | 0 | 1 | 0 | 0 |   |
| 0                         | 0 | 1 | 1 | 1 | 0 | 1 | 0 | 0 | 0 | 1 | 0 | 1 |   |
| 0                         | 0 | 0 | 1 | 0 | 1 | 1 | 1 | 1 | 0 | 0 | ? | 0 |   |

|   |   |   |   |   |   |   |   |   |   |   |   |   |
|---|---|---|---|---|---|---|---|---|---|---|---|---|
| 1 | 0 | 1 | 0 | 0 | 1 | 0 | 0 | 1 | 0 | 0 | 0 | 1 |
| 0 | 0 | 1 | 0 | 1 | 0 | 0 | 0 | 0 | 0 | 0 | 0 | 1 |
| ? | 0 | 0 | 1 | 0 | 0 | 1 | 1 | 0 | 0 | 1 | 0 | 0 |
| 0 | 1 | ? | ? | ? | 0 | 0 | 0 | 0 | 1 |   |   |   |

Mecistops cataphractus

|   |   |   |   |   |   |   |   |   |   |   |   |   |
|---|---|---|---|---|---|---|---|---|---|---|---|---|
|   |   |   | 1 | 0 | ? | 0 | 0 | 1 | 0 | 0 | 1 | ? |
| 0 | 0 | 0 | 0 | 1 | 0 | 0 | 0 | 0 | 0 | 1 | 1 | 1 |
| 0 | 0 | 1 | 1 | 1 | 1 | 1 | 2 | 0 | 1 | 2 | 0 | 0 |
| 0 | 1 | 1 | 1 | 1 | 0 | 1 | 1 | 0 | 1 | 1 | 1 | 1 |
| 0 | 4 | 1 | 0 | 1 | 0 | 1 | 0 | 0 | 0 | 1 | 0 | 0 |
| 2 | 0 | 0 | 0 | 1 | 1 | 1 | 0 | 1 | 0 | 1 | ? | 1 |
| 0 | 0 | 1 | 0 | 0 | 1 | 2 | 0 | 0 | 0 | 0 | 0 | 0 |
| 1 | 0 | 0 | 2 | 1 | 0 | 0 | 0 | 0 | 1 | 0 | 0 | 0 |
| 1 | 0 | 0 | 0 | 0 | 0 | 1 | 1 | 0 | 1 | 0 | 0 | 0 |
| 0 | 1 | 0 | 1 | 1 | 0 | 1 | 0 | 0 | 0 | 1 | 0 | 1 |
| 0 | 0 | 0 | 0 | 0 | 1 | 1 | 1 | 1 | 1 | 0 | 0 | 0 |
| 0 | 1 | 0 | 1 | 1 | 1 | 0 | 0 | 1 | 2 | 0 | 0 | 1 |
| 0 | 0 | 1 | 0 | 1 | 0 | 0 | 0 | 1 | 1 | 1 | 0 | 1 |
| 0 | 1 | 1 | 1 | 1 | 0 | 0 | 1 | 0 | 0 | 0 | 0 | 0 |
| 0 | 3 | 0 | 0 | ? | 1 | 1 | 1 | 0 | 1 |   |   |   |

Crocodylus niloticus

|   |   |   |   |     |   |   |   |   |   |   |     |   |   |
|---|---|---|---|-----|---|---|---|---|---|---|-----|---|---|
|   |   |   | 1 | 0   | 1 | 0 | 0 | 0 | 0 | 0 | 1   | ? | 1 |
| 0 | 1 | 0 | 1 | 0   | 0 | 0 | 1 | 0 | 1 | 1 | 1   | 1 | 0 |
| 0 | 1 | 1 | 1 | 1   | 1 | 1 | 2 | 0 | 1 | 2 | 0   | 0 | 0 |
| 1 | 1 | 1 | 2 | 0   | 1 | 1 | 0 | 1 | 1 | 1 | 1   | 0 | 0 |
| 2 | 1 | 0 | 1 | 0   | 1 | 0 | 0 | 0 | 1 | 0 | 1   | 1 | 2 |
| 0 | 0 | 0 | 1 | 1   | 1 | 0 | 1 | 0 | 1 | 1 | 1   | 1 | 0 |
| 0 | 1 | 0 | 0 | 1   | 1 | 0 | 0 | 0 | 0 | 0 | 0   | 0 | 1 |
| 0 | 0 | 2 | 1 | 0   | 0 | 0 | 0 | 1 | 0 | 0 | 1   | 1 | 1 |
| 0 | 0 | 0 | 0 | 0/1 | 1 | 1 | 0 | 1 | 0 | 0 | 0/1 | 0 | 0 |
| 0 | 0 | 1 | 1 | 0   | 1 | 0 | 0 | 0 | 1 | 0 | 1   | 1 | 1 |
| 0 | 0 | 0 | 0 | 1   | 1 | 1 | 1 | 1 | 1 | 0 | 0   | 0 | 0 |
| 1 | 0 | 1 | 1 | 1   | 0 | 0 | 1 | 2 | 0 | 0 | 1   | 0 | 0 |
| 0 | 1 | 0 | 1 | 0   | 0 | 0 | 1 | 1 | 1 | 1 | 0   | 1 | 0 |
| 1 | 1 | 1 | 1 | 0   | 0 | 1 | 1 | 0 | 0 | 0 | 0   | 0 | 0 |
| 3 | 0 | 1 | 1 | 0   | 0 | 0 | 0 | 1 |   |   |     |   |   |

Crocodylus porosus

|   |   |   |   |   |   |   |   |   |   |   |     |   |   |
|---|---|---|---|---|---|---|---|---|---|---|-----|---|---|
|   |   |   | 1 | 1 | 1 | 0 | 0 | 0 | 0 | 0 | 1   | ? | 0 |
| 0 | 1 | 0 | 1 | 0 | 1 | 0 | 1 | 0 | 1 | 1 | 1   | 1 | 0 |
| 0 | 0 | 1 | 1 | 1 | 1 | 1 | 2 | 0 | 1 | 2 | 0   | 0 | 0 |
| 1 | 1 | 1 | 2 | 0 | 1 | 1 | 0 | 1 | 1 | 1 | 1   | 0 | 0 |
| 2 | 1 | 0 | 1 | 0 | 1 | 0 | 0 | 0 | 1 | 0 | 1   | 1 | 2 |
| 0 | 0 | 0 | 1 | 1 | 1 | 0 | 1 | 0 | 1 | 1 | 1   | 1 | 0 |
| 0 | 1 | 0 | 0 | 1 | 1 | 0 | 0 | 0 | 0 | 0 | 0   | 0 | 1 |
| 0 | 0 | 2 | 1 | 0 | 0 | 0 | 1 | 1 | 0 | 0 | 1   | 1 | 1 |
| 0 | 0 | 0 | 0 | 0 | 1 | 1 | 0 | 1 | 0 | 0 | 0/1 | 0 | 0 |
| 0 | 0 | 1 | 1 | 0 | 1 | 0 | 0 | 0 | 1 | 0 | 1   | 0 | 0 |

|   |   |   |   |   |   |   |   |   |   |   |   |   |
|---|---|---|---|---|---|---|---|---|---|---|---|---|
| 0 | 0 | 0 | 0 | 1 | 1 | 1 | 1 | 1 | 0 | 0 | 0 | 0 |
| 1 | 0 | 1 | 1 | 1 | 0 | 0 | 1 | 2 | 0 | 0 | 1 | 0 |
| 0 | 1 | 0 | 1 | 0 | 0 | 0 | 1 | 1 | 1 | 0 | 1 | 0 |
| 1 | 1 | 1 | 1 | 0 | 0 | 1 | 1 | 0 | 0 | 0 | 0 | 0 |
| 3 | 0 | 1 | 1 | 0 | 0 | 0 | 0 | 1 |   |   |   |   |

Crocodylus rhombifer

|   |   |   |   |   |   |   |   |   |   |   |     |   |
|---|---|---|---|---|---|---|---|---|---|---|-----|---|
| 0 | 0 | 1 | 0 | 0 | 0 | 0 | 0 | 0 | 0 | 1 | ?   | 1 |
| 0 | 1 | 0 | 1 | 0 | 0 | 0 | 1 | 0 | 1 | 1 | 1   | 0 |
| 0 | 1 | 1 | 1 | 1 | 1 | 2 | 0 | 1 | 1 | 0 | 0   | 0 |
| 1 | 1 | 1 | 2 | 0 | 1 | 1 | 0 | 1 | 1 | 1 | 0   | 0 |
| 2 | 1 | 0 | 1 | 0 | 1 | 0 | 0 | 0 | 1 | 0 | 1   | 2 |
| 0 | 0 | 0 | 1 | 1 | 1 | 0 | 1 | 0 | 1 | 1 | 1   | 0 |
| 0 | 1 | 0 | 0 | 1 | 1 | 0 | 0 | 0 | 0 | 0 | 0   | 1 |
| 0 | 0 | 2 | 1 | 0 | 1 | 0 | 0 | 1 | 0 | 0 | 1   | 1 |
| 0 | 0 | 0 | 0 | 0 | 1 | 1 | 0 | 1 | 0 | 0 | 0/1 | 0 |
| 0 | 0 | 1 | 1 | 0 | 1 | 0 | 0 | 0 | 1 | 0 | 1   | 1 |
| 0 | 0 | 0 | 0 | 1 | 1 | 1 | 1 | 1 | 0 | 0 | 0   | 0 |
| 1 | 0 | 1 | 1 | 1 | 0 | 0 | 1 | 2 | 0 | 0 | 1   | 0 |
| 0 | 1 | 1 | 1 | 0 | 0 | 0 | 1 | 1 | 1 | 0 | 1   | 0 |
| 1 | 1 | 1 | 1 | 0 | 0 | 1 | 1 | 0 | 0 | 0 | 0   | 0 |
| 3 | 0 | 1 | 2 | 0 | 0 | 0 | 0 | 1 |   |   |     |   |

Crocodylus acutus

|   |   |   |   |   |   |   |   |   |   |   |     |   |
|---|---|---|---|---|---|---|---|---|---|---|-----|---|
| 0 | 0 | 1 | 0 | 0 | 0 | 0 | 0 | 0 | 0 | 1 | ?   | 1 |
| 0 | 1 | 0 | 1 | 1 | 0 | 0 | 1 | 0 | 1 | 1 | 1   | 0 |
| 0 | 1 | 1 | 1 | 1 | 1 | 2 | 0 | 1 | 2 | 0 | 0   | 0 |
| 1 | 1 | 0 | 2 | 0 | 1 | 1 | 0 | 1 | 1 | 1 | 0   | 0 |
| 2 | 1 | 0 | 1 | 0 | 1 | 0 | 0 | 0 | 1 | 0 | 1   | 2 |
| 0 | 0 | 0 | 1 | 1 | 1 | 0 | 1 | 0 | 1 | 1 | 1   | 0 |
| 0 | 1 | 0 | 0 | 1 | 1 | 0 | 0 | 0 | 0 | 0 | 0   | 1 |
| 0 | 0 | 2 | 1 | 0 | 1 | 0 | 0 | 1 | 0 | 0 | 1   | 1 |
| 0 | 0 | 0 | 0 | 0 | 1 | 1 | 0 | 1 | 0 | 0 | 0/1 | 0 |
| 0 | 0 | 1 | 1 | 0 | 1 | 0 | 0 | 0 | 1 | 0 | 1   | 1 |
| 0 | 0 | 0 | 0 | 1 | 1 | 1 | 1 | 1 | 0 | 0 | 0   | 0 |
| 1 | 0 | 1 | 1 | 1 | 0 | 0 | 1 | 2 | 0 | 0 | 1   | 0 |
| 0 | 1 | 0 | 1 | 0 | 0 | 0 | 1 | 1 | 1 | 0 | 1   | 0 |
| 1 | 1 | 1 | 1 | 0 | 0 | 1 | 1 | 0 | 0 | 0 | 0   | 0 |
| 3 | 0 | 1 | 2 | 0 | 0 | 0 | 0 | 1 |   |   |     |   |

Crocodylus palustris

|   |   |   |   |   |   |   |   |   |   |   |     |   |
|---|---|---|---|---|---|---|---|---|---|---|-----|---|
| 1 | 0 | 1 | 0 | 0 | 0 | 0 | 0 | 0 | 0 | 1 | ?   | 0 |
| 0 | 1 | 0 | 1 | 0 | 0 | 1 | 1 | 0 | 1 | 1 | 1   | 0 |
| 0 | 1 | 1 | 1 | 1 | 1 | 2 | 1 | 1 | 2 | 1 | 0   | 0 |
| 1 | 1 | 1 | 2 | 0 | 1 | 1 | 0 | 1 | 1 | 1 | 0   | 0 |
| 2 | 1 | 0 | 1 | 0 | 1 | 0 | 0 | 0 | 1 | 0 | 1   | 2 |
| 0 | 0 | 0 | 1 | 1 | 1 | 0 | 1 | 0 | 1 | 1 | 1   | 0 |
| 0 | 1 | 0 | 0 | 1 | 1 | 0 | 0 | 0 | 0 | 0 | 0   | 1 |
| 0 | 0 | 2 | 1 | 0 | 0 | 0 | 1 | 1 | 0 | 0 | 1   | 1 |
| 0 | 0 | 0 | 0 | 0 | 1 | 1 | 0 | 1 | 0 | 0 | 0/1 | 0 |

|   |   |   |   |   |   |   |   |   |   |   |   |   |
|---|---|---|---|---|---|---|---|---|---|---|---|---|
| 0 | 0 | 1 | 1 | 0 | 1 | 0 | 0 | 0 | 1 | 0 | 1 | 0 |
| 0 | 0 | 0 | 0 | 1 | 1 | 1 | 1 | 1 | 0 | 0 | 0 | 0 |
| 1 | 0 | 1 | 1 | 1 | 0 | 0 | 1 | 2 | 0 | 0 | 1 | 0 |
| 0 | 1 | 0 | 1 | 0 | 0 | 0 | 1 | 1 | 1 | 0 | 1 | 0 |
| 1 | 1 | 1 | 1 | 0 | 0 | 1 | 1 | 0 | 0 | 0 | 0 | 0 |
| 3 | 0 | 1 | 1 | 0 | 0 | 0 | 0 | 1 |   |   |   |   |

*Crocodylus siamensis*

|   |   |   |   |   |   |   |   |   |   |   |     |   |
|---|---|---|---|---|---|---|---|---|---|---|-----|---|
| 1 | 1 | 1 | 0 | 0 | 0 | 0 | 0 | 0 | 0 | 1 | ?   | 1 |
| 1 | 1 | 0 | 1 | 0 | 0 | 0 | 0 | 0 | 1 | 1 | 1   | 0 |
| 0 | 1 | 0 | 1 | 1 | 1 | 2 | 0 | 1 | 2 | 0 | 0   | 0 |
| 1 | 1 | 1 | 2 | 0 | 1 | 1 | 0 | 1 | 1 | 1 | 0   | 0 |
| 2 | 1 | 0 | 1 | 0 | 1 | 0 | 0 | 0 | 1 | 0 | 1   | 2 |
| 0 | 0 | 0 | 1 | 1 | 1 | 0 | 1 | 0 | 1 | 1 | 1   | 0 |
| 0 | 1 | 0 | 0 | 1 | 1 | 0 | 0 | 0 | 0 | 0 | 0   | 1 |
| 0 | 0 | 2 | 1 | 0 | 0 | 0 | 1 | 1 | 0 | 0 | 1   | 1 |
| 0 | 0 | 0 | 0 | 0 | 1 | 1 | 0 | 1 | 0 | 0 | 0/1 | 0 |
| 0 | 0 | 1 | 1 | 0 | 1 | 0 | 0 | 0 | 1 | 0 | 1   | 0 |
| 0 | 0 | 0 | 0 | 1 | 1 | 1 | 1 | 1 | 0 | 0 | 0   | 0 |
| 1 | 0 | 1 | 1 | 1 | 0 | 0 | 1 | 2 | 0 | 0 | 1   | 0 |
| 0 | 1 | 1 | 1 | 0 | 0 | 0 | 1 | 1 | 1 | 0 | 1   | 0 |
| 1 | 1 | 1 | 1 | 0 | 0 | 1 | 1 | 0 | 0 | 0 | 0   | 0 |
| 3 | 0 | 1 | 1 | 0 | 0 | 0 | 1 | 1 |   |   |     |   |

*Crocodylus intermedius*

|   |   |   |   |   |   |   |   |   |   |   |     |   |
|---|---|---|---|---|---|---|---|---|---|---|-----|---|
| 0 | 0 | 1 | 0 | 0 | 0 | 0 | 0 | 0 | 0 | 1 | ?   | 1 |
| 0 | 1 | 0 | 1 | 0 | 0 | 0 | 1 | 0 | 1 | 1 | 1   | 0 |
| 0 | 1 | 1 | 1 | 1 | 1 | 2 | 0 | 1 | 2 | 0 | 0   | 0 |
| 1 | 1 | 1 | 2 | 0 | 1 | 1 | 0 | 1 | 1 | 1 | 1   | 0 |
| 2 | 1 | 0 | 1 | 0 | 1 | 0 | 0 | 0 | 1 | 0 | 1   | 2 |
| 0 | 0 | 0 | 1 | 1 | 1 | 0 | 1 | 0 | 1 | 1 | 1   | 0 |
| 0 | 1 | 0 | 0 | 1 | 1 | 0 | 0 | 0 | 0 | 0 | 0   | 1 |
| 0 | 0 | 2 | 1 | 0 | 1 | 0 | 0 | 1 | 0 | 0 | 1   | 1 |
| 0 | 0 | 0 | 0 | 0 | 1 | 1 | 0 | 1 | 0 | 0 | 0/1 | 0 |
| 0 | 0 | 1 | 1 | 0 | 1 | 0 | 0 | 0 | 1 | 0 | 1   | 0 |
| 0 | 0 | 0 | 0 | 1 | 1 | 1 | 1 | 1 | 0 | 0 | 0   | 0 |
| 1 | 0 | 1 | 1 | 1 | 0 | 0 | 1 | 2 | 0 | 0 | 1   | 0 |
| 0 | 1 | 0 | 1 | 0 | 0 | 0 | 1 | 1 | 1 | 0 | 1   | 0 |
| 1 | 1 | 1 | 1 | 0 | 0 | 1 | 1 | 0 | 0 | 0 | 0   | 0 |
| 3 | 0 | 1 | 2 | 0 | 0 | 0 | 0 | 1 |   |   |     |   |

*Crocodylus johnstoni*

|   |   |   |   |   |   |   |   |   |   |   |   |   |
|---|---|---|---|---|---|---|---|---|---|---|---|---|
| 1 | 1 | 1 | 0 | 0 | 0 | 0 | 0 | 0 | 0 | 1 | ? | 0 |
| 0 | 1 | 0 | 1 | 0 | 1 | 0 | 1 | 0 | 1 | 1 | 1 | 0 |
| 0 | 0 | 1 | 1 | 1 | 1 | 2 | 0 | 1 | 2 | 0 | 0 | 0 |
| 1 | 1 | 1 | 2 | 0 | 1 | 1 | 0 | 1 | 1 | 1 | ? | 0 |
| 2 | 1 | 0 | 1 | 0 | 1 | 0 | 0 | 0 | 1 | 0 | 1 | 2 |
| 0 | 0 | 0 | 1 | 1 | 1 | 0 | 1 | 0 | 1 | 1 | 1 | 0 |
| 0 | 1 | 0 | 0 | 1 | 1 | 0 | 0 | 0 | 0 | 0 | 0 | 1 |
| 0 | 0 | 2 | 1 | 0 | 0 | 0 | 1 | 1 | 0 | 0 | 1 | 1 |

|   |   |   |   |   |   |   |   |   |   |   |     |   |
|---|---|---|---|---|---|---|---|---|---|---|-----|---|
| 0 | 0 | 0 | 0 | 0 | 1 | 1 | 0 | 1 | 0 | 0 | 0/1 | 0 |
| 1 | 0 | 1 | 1 | 0 | 1 | 0 | 0 | 0 | 1 | 0 | 1   | 0 |
| 0 | 0 | 0 | 0 | 1 | 1 | 1 | 1 | 1 | 0 | 0 | 0   | 0 |
| 1 | 0 | 1 | 1 | 1 | 0 | 0 | 1 | 2 | 0 | 0 | 1   | 0 |
| 0 | 1 | 0 | 1 | 0 | 0 | 0 | 1 | 1 | 1 | 0 | 1   | 0 |
| 1 | 1 | 1 | 1 | 0 | 0 | 1 | 1 | 0 | 0 | 0 | 0   | 0 |
| 3 | 0 | 1 | 1 | 0 | 0 | 0 | 0 | 1 |   |   |     |   |

*Crocodylus mindorensis*

|   |   |   |   |   |   |   |   |   |   |   |   |     |
|---|---|---|---|---|---|---|---|---|---|---|---|-----|
|   |   |   | 1 | 1 | 1 | 0 | 0 | 0 | 0 | 0 | 1 | ?   |
| 0 | 0 | 1 | 0 | 1 | 0 | 1 | 0 | 1 | 0 | 1 | 1 | 1   |
| 0 | 0 | 0 | 1 | 1 | 1 | 1 | 2 | 0 | 1 | 2 | 0 | 0   |
| 0 | 1 | 1 | 1 | 2 | 0 | 1 | 1 | 0 | 1 | 1 | 1 | 0   |
| 0 | 2 | 1 | 0 | 1 | 0 | 1 | 0 | 0 | 0 | 1 | 0 | 1   |
| 2 | 0 | 0 | 0 | 1 | 1 | 1 | 0 | 1 | 0 | 1 | 1 | 1   |
| 0 | 0 | 1 | 0 | 0 | 1 | 1 | 0 | 0 | 0 | 0 | 0 | 0   |
| 1 | 0 | 0 | 2 | 1 | 0 | 0 | 0 | 1 | 1 | 0 | 0 | 1   |
| 1 | 0 | 0 | 0 | 0 | 0 | 1 | 1 | 0 | 1 | 0 | 0 | 0/1 |
| 0 | 0 | 0 | 1 | 1 | 0 | 1 | 0 | 0 | 0 | 1 | 0 | 1   |
| 0 | 0 | 0 | 0 | 0 | 1 | 1 | 1 | 1 | 1 | 0 | 0 | 0   |
| 0 | 1 | 0 | 1 | 1 | 1 | 0 | 0 | 1 | 2 | 0 | 0 | 1   |
| 0 | 0 | 1 | 0 | 1 | 0 | 0 | 0 | 1 | 1 | 1 | 0 | 1   |
| 0 | 1 | 1 | 1 | 1 | 0 | 0 | 1 | 1 | 0 | 0 | 0 | 0   |
| 0 | 3 | 0 | 1 | 1 | 0 | 0 | 0 | 0 | 1 |   |   |     |

*Crocodylus novaeguineae*

|   |   |   |   |   |   |   |   |   |   |   |   |     |
|---|---|---|---|---|---|---|---|---|---|---|---|-----|
|   |   |   | 1 | 1 | 1 | 0 | 0 | 0 | 0 | 0 | 1 | ?   |
| 0 | 0 | 1 | 0 | 1 | 0 | 1 | 0 | 1 | 0 | 1 | 1 | 1   |
| 0 | 0 | 0 | 1 | 1 | 1 | 1 | 2 | 0 | 1 | 2 | 0 | 0   |
| 0 | 1 | 1 | 1 | 2 | 0 | 1 | 1 | 0 | 1 | 1 | 1 | 0   |
| 0 | 2 | 1 | 0 | 1 | 0 | 1 | 0 | 0 | 0 | 1 | 0 | 1   |
| 2 | 0 | 0 | 0 | 1 | 1 | 1 | 0 | 1 | 0 | 1 | 1 | 1   |
| 0 | 0 | 1 | 0 | 0 | 1 | 1 | 0 | 0 | 0 | 0 | 0 | 0   |
| 1 | 0 | 0 | 2 | 1 | 0 | 0 | 0 | 1 | 1 | 0 | 0 | 1   |
| 1 | 0 | 0 | 0 | 0 | 0 | 1 | 1 | 0 | 1 | 0 | 0 | 0/1 |
| 0 | 0 | 0 | 1 | 1 | 0 | 1 | 0 | 0 | 0 | 1 | 0 | 1   |
| 0 | 0 | 0 | 0 | 0 | 1 | 1 | 1 | 1 | 1 | 0 | 0 | 0   |
| 0 | 1 | 0 | 1 | 0 | 1 | 0 | 0 | 1 | 2 | 0 | 0 | 1   |
| 0 | 0 | 1 | 0 | 1 | 0 | 0 | 0 | 1 | 1 | 0 | 0 | 1   |
| 0 | 1 | 1 | 1 | 1 | 0 | 0 | 1 | 1 | 0 | 0 | 0 | 0   |
| 0 | 3 | 0 | 1 | 1 | 0 | 0 | 0 | 0 | 1 |   |   |     |

*Crocodylus raninus*

|   |   |   |   |   |   |   |   |   |   |   |   |   |
|---|---|---|---|---|---|---|---|---|---|---|---|---|
|   |   | ? | ? | ? | ? | ? | ? | ? | ? | ? | ? | ? |
| ? | ? | ? | ? | ? | ? | ? | ? | ? | ? | ? | ? | ? |
| ? | ? | ? | ? | ? | ? | ? | ? | ? | ? | ? | ? | ? |
| ? | ? | ? | ? | ? | ? | ? | ? | ? | ? | ? | ? | ? |
| ? | ? | ? | ? | ? | ? | ? | ? | ? | ? | ? | ? | ? |
| ? | ? | 0 | 0 | 1 | 1 | 0 | ? | 0 | 0 | 0 | 0 | 1 |

|   |   |   |   |   |   |   |   |   |   |   |   |   |
|---|---|---|---|---|---|---|---|---|---|---|---|---|
| 0 | 0 | 2 | 1 | 0 | 0 | 0 | 1 | 1 | 0 | 0 | 1 | 1 |
| 0 | 0 | 0 | 0 | 0 | 1 | 1 | 0 | 1 | 0 | 0 | 1 | 0 |
| 0 | 0 | 1 | 1 | 0 | 1 | 0 | 0 | 0 | 1 | 0 | 1 | 0 |
| 0 | 0 | 0 | 0 | 1 | 1 | 1 | 1 | 1 | 0 | 0 | 0 | 0 |
| 1 | 0 | 1 | 0 | 1 | 0 | 0 | 1 | 2 | 0 | 0 | 1 | 0 |
| 0 | 1 | 0 | 1 | 0 | 0 | 0 | 1 | 1 | 0 | 0 | 1 | 0 |
| 1 | 1 | 0 | 1 | 0 | 0 | 1 | 1 | 0 | 3 | 0 | 0 | 0 |
| 0 | ? | ? | ? | 0 | 0 | 0 | 0 | ? |   |   |   |   |

*Crocodylus moreletii*

|   |   |   |   |   |   |   |   |   |   |   |     |   |
|---|---|---|---|---|---|---|---|---|---|---|-----|---|
| 0 | 0 | 1 | 0 | 0 | 0 | 0 | 0 | 0 | 0 | 1 | ?   | 1 |
| 0 | 1 | 0 | 1 | 0 | 0 | 0 | 1 | 0 | 1 | 1 | 1   | 0 |
| 0 | 1 | 1 | 1 | 1 | 1 | 2 | 0 | 1 | 2 | 0 | 0   | 0 |
| 1 | 1 | 1 | 2 | 0 | 1 | 1 | 0 | 1 | 1 | 1 | 1   | 0 |
| 2 | 1 | 0 | 1 | 0 | 1 | 0 | 0 | 0 | 1 | 0 | 1   | 2 |
| 0 | 0 | 0 | 1 | 1 | 1 | 0 | 1 | 0 | 1 | 1 | 1   | 0 |
| 0 | 1 | 0 | 0 | 1 | 1 | 0 | 0 | 0 | 0 | 0 | 0   | 1 |
| 0 | 0 | 2 | 1 | 0 | 1 | 0 | 0 | 1 | 0 | 0 | 1   | 1 |
| 0 | 0 | 0 | 0 | 0 | 1 | 1 | 0 | 1 | 0 | 0 | 0/1 | 0 |
| 0 | 0 | 1 | 1 | 0 | 1 | 0 | 0 | 0 | 1 | 0 | 1   | 1 |
| 0 | 0 | 0 | 0 | 1 | 1 | 1 | 1 | 1 | 0 | 0 | 0   | 0 |
| 1 | 0 | 1 | 1 | 1 | 0 | 0 | 1 | 2 | 0 | 0 | 1   | 0 |
| 0 | 1 | 0 | 1 | 0 | 0 | 0 | 1 | 1 | 1 | 0 | 1   | 0 |
| 1 | 1 | 1 | 1 | 0 | 0 | 1 | 1 | 0 | 0 | 0 | 0   | 0 |
| 3 | 0 | 1 | 2 | 0 | 0 | 0 | 0 | 1 |   |   |     |   |

*Crocodylus palaeindicus*

|   |   |   |   |   |   |   |   |   |   |   |   |   |   |
|---|---|---|---|---|---|---|---|---|---|---|---|---|---|
| ? | ? | ? | ? | ? | ? | ? | ? | ? | ? | 0 | ? | ? | ? |
| ? | ? | ? | ? | ? | ? | ? | ? | ? | ? | 0 | ? | 1 | ? |
| ? | ? | ? | ? | ? | ? | ? | ? | ? | ? | 1 | ? | ? | ? |
| ? | ? | ? | ? | ? | ? | ? | ? | ? | ? | ? | 1 | 1 | 0 |
| 0 | 2 | 1 | 0 | 1 | 0 | 1 | ? | 0 | 0 | 0 | 1 | 0 | 1 |
| 2 | 0 | 0 | 0 | 1 | 1 | ? | 0 | 1 | ? | ? | 1 | 1 | ? |
| ? | ? | ? | 0 | 0 | 1 | 1 | 0 | ? | 0 | 0 | 0 | 0 | 0 |
| ? | 0 | 0 | 2 | 1 | 0 | 0 | 0 | 0 | 0 | 1 | 0 | 0 | ? |
| 1 | 0 | 0 | 0 | 0 | 0 | 1 | 1 | 0 | 1 | 0 | 0 | 0 | 1 |
| 0 | 0 | 0 | 0 | 1 | 0 | 1 | 0 | 0 | ? | ? | 1 | 0 | 1 |
| 0 | 0 | 0 | 0 | 0 | 1 | 1 | 1 | 1 | 1 | 1 | 0 | ? | 0 |
| 0 | 1 | 0 | 1 | 1 | ? | 0 | 0 | 1 | 2 | 0 | 0 | 0 | 1 |
| 0 | 0 | 1 | 0 | 1 | 0 | 1 | 0 | 0 | 1 | 1 | ? | ? | 1 |
| ? | 1 | 1 | 1 | 1 | 0 | 0 | 1 | 1 | 0 | 0 | 0 | 0 | 0 |
| 0 | 3 | ? | ? | ? | 0 | 0 | 0 | ? | ? | 1 |   |   |   |

*Crocodylus anthropophagus*

|   |   |   |   |   |   |   |   |   |   |   |   |   |   |
|---|---|---|---|---|---|---|---|---|---|---|---|---|---|
| ? | ? | ? | ? | ? | ? | ? | ? | ? | ? | ? | ? | ? | ? |
| ? | ? | ? | ? | 1 | 0 | ? | ? | ? | ? | 0 | 1 | ? | 1 |
| 0 | 0 | 1 | 1 | 1 | ? | ? | ? | ? | ? | 1 | 2 | 0 | 0 |
| ? | 1 | 1 | ? | ? | ? | ? | 1 | ? | ? | ? | 1 | 1 | ? |
| 0 | 2 | 1 | ? | 1 | ? | ? | 1 | ? | 0 | ? | 1 | 0 | ? |
| 2 | 0 | ? | 0 | 1 | 1 | 1 | 0 | 1 | 0 | 0 | 1 | 1 | ? |

|   |   |   |   |   |   |   |   |   |   |   |   |   |
|---|---|---|---|---|---|---|---|---|---|---|---|---|
| ? | ? | ? | 0 | 0 | 0 | 1 | 0 | ? | 0 | 0 | 0 | 0 |
| 1 | 0 | 0 | 2 | 1 | 0 | 0 | 0 | 0 | 1 | 0 | ? | 1 |
| 1 | 0 | 0 | 0 | 0 | 1 | 1 | 1 | 0 | 1 | 0 | ? | 0 |
| ? | ? | ? | 1 | ? | 0 | 1 | 0 | 0 | ? | ? | 0 | 1 |
| ? | 0 | 0 | 0 | ? | 1 | 1 | 1 | 1 | 1 | 0 | ? | ? |
| ? | 1 | ? | 1 | 0 | ? | 0 | 0 | 1 | 1 | 0 | 0 | 1 |
| 0 | 0 | 1 | 1 | 1 | 0 | 0 | ? | 1 | ? | 1 | ? | 1 |
| ? | ? | 1 | 1 | 1 | 0 | 0 | 1 | 1 | 0 | 0 | 0 | 0 |
| 0 | 3 | ? | ? | ? | ? | ? | ? | 0 | ? |   |   |   |

*Crocodylus thorbjarnarsoni*

|   |   |   |   |   |   |   |   |   |   |   |   |   |
|---|---|---|---|---|---|---|---|---|---|---|---|---|
| ? | ? | ? | ? | ? | ? | ? | ? | ? | ? | ? | ? | ? |
| ? | ? | ? | ? | ? | ? | ? | ? | ? | ? | ? | ? | ? |
| ? | ? | ? | ? | ? | ? | ? | ? | ? | ? | ? | ? | ? |
| ? | ? | ? | ? | ? | ? | ? | ? | ? | ? | 1 | 1 | ? |
| 0 | 2 | 1 | 0 | 1 | 0 | 1 | 0 | 0 | 0 | 1 | 0 | 1 |
| 2 | 0 | 0 | 0 | 1 | 1 | 1 | 0 | 1 | 0 | 1 | 1 | ? |
| ? | ? | ? | 0 | 0 | 0 | 1 | 0 | ? | 0 | 0 | 0 | 0 |
| 1 | 0 | 0 | 2 | 1 | 0 | 0 | 0 | 0 | 1 | 0 | 0 | ? |
| ? | 0 | 0 | 0 | 0 | 1 | 1 | ? | ? | ? | 0 | 0 | 0 |
| 0 | 0 | 0 | 1 | 1 | 0 | 1 | 0 | 0 | 0 | 0 | 0 | 1 |
| ? | 0 | 0 | 0 | 0 | 1 | 1 | 1 | 1 | 1 | 0 | ? | 0 |
| 0 | 1 | ? | 1 | 0 | 1 | 0 | 0 | 1 | 2 | 0 | 0 | 1 |
| 0 | 0 | 1 | 1 | 1 | 0 | ? | ? | 1 | 1 | 1 | ? | 1 |
| ? | ? | ? | 1 | 1 | 0 | 0 | 1 | 1 | 0 | 0 | 0 | 0 |
| 0 | 3 | ? | ? | ? | 0 | 0 | 0 | 0 | ? |   |   |   |

*Euthecodon brumpti*

|   |   |   |   |   |   |   |   |   |   |   |   |   |
|---|---|---|---|---|---|---|---|---|---|---|---|---|
| ? | ? | ? | ? | ? | ? | ? | ? | ? | ? | ? | ? | ? |
| ? | ? | ? | ? | ? | ? | ? | ? | ? | ? | ? | ? | ? |
| ? | ? | ? | ? | ? | ? | ? | ? | ? | ? | ? | ? | ? |
| 1 | 0 | ? | ? | ? | 1 | ? | ? | ? | 1 | 1 | 2 | 2 |
| 4 | ? | 0 | 4 | ? | ? | ? | ? | ? | 1 | 0 | 0 | 2 |
| 0 | ? | 0 | 1 | 1 | 1 | 0 | 1 | 0 | 1 | 0 | ? | ? |
| ? | ? | 0 | 0 | 0 | 2 | 0 | ? | 0 | 0 | ? | 0 | 1 |
| 1 | 0 | 2 | 5 | 0 | 0 | 0 | 1 | 1 | 0 | 0 | 0 | 1 |
| 0 | 0 | 0 | 0 | 0 | ? | ? | ? | ? | 0 | 0 | 1 | 0 |
| 0 | 0 | 1 | 1 | 0 | 1 | 0 | 1 | 0 | 0 | 0 | 1 | 0 |
| 0 | 0 | 0 | 0 | 1 | 1 | 1 | 1 | 1 | 0 | ? | ? | ? |
| 1 | 0 | 1 | 1 | 1 | 0 | 0 | 1 | 1 | 1 | 0 | 1 | 0 |
| 0 | 1 | 1 | 1 | 0 | 0 | ? | 1 | 1 | 1 | ? | 1 | ? |
| ? | 1 | 1 | 1 | 0 | 0 | 1 | 0 | 0 | 0 | 0 | 0 | 0 |
| 3 | ? | ? | ? | 0 | 0 | 0 | 0 | ? |   |   |   |   |

*Euthecodon arambourgii*

|   |   |   |   |   |   |   |   |   |   |   |   |   |
|---|---|---|---|---|---|---|---|---|---|---|---|---|
| ? | ? | ? | ? | ? | ? | ? | ? | ? | ? | ? | ? | ? |
| ? | ? | ? | ? | ? | ? | ? | ? | ? | ? | ? | ? | ? |
| ? | ? | ? | ? | ? | ? | ? | ? | ? | ? | ? | ? | ? |
| ? | ? | ? | ? | ? | ? | ? | ? | ? | ? | ? | ? | ? |
| ? | ? | ? | ? | 0 | ? | ? | ? | ? | ? | ? | ? | ? |

|   |   |   |   |   |   |   |   |   |   |   |   |   |
|---|---|---|---|---|---|---|---|---|---|---|---|---|
| ? | ? | ? | ? | ? | ? | ? | ? | ? | ? | 1 | ? | ? |
| ? | ? | ? | 0 | 0 | 0 | 2 | 0 | ? | 0 | 0 | 0 | 0 |
| ? | 1 | 0 | 2 | 5 | 0 | 0 | 0 | 1 | 1 | 0 | 0 | ? |
| 1 | 0 | 0 | 0 | 0 | 0 | 1 | 1 | 0 | 1 | 0 | 0 | 0 |
| 0 | 0 | 0 | ? | ? | 0 | ? | ? | ? | ? | 0 | ? | ? |
| ? | 0 | 0 | 0 | 0 | 1 | 1 | 1 | 1 | 1 | 0 | ? | ? |
| 1 | 1 | 0 | 1 | 1 | ? | 0 | 0 | 1 | 2 | 1 | 0 | 1 |
| 0 | 0 | 1 | 0 | 1 | 1 | 0 | 0 | ? | ? | ? | ? | 1 |
| ? | ? | 1 | 1 | ? | 0 | ? | 1 | 0 | 0 | 0 | ? | 0 |
| 0 | 3 | ? | ? | ? | 0 | 0 | 0 | 0 | ? |   |   |   |

*Osteolaemus tetraspis*

|   |   |   |   |   |   |   |   |   |   |   |   |   |
|---|---|---|---|---|---|---|---|---|---|---|---|---|
| ? | ? | 1 | ? | 0 | 0 | 0 | 0 | 0 | 0 | 1 | ? | 0 |
| 0 | 1 | 0 | 1 | 0 | 1 | 0 | 0 | 0 | 1 | 1 | 1 | 0 |
| 0 | 1 | 1 | 1 | 1 | 1 | 2 | 0 | 1 | 1 | 1 | 0 | 0 |
| 1 | 1 | 1 | 1 | 1 | 1 | 1 | 0 | 1 | 1 | 1 | 0 | 0 |
| 2 | 1 | 0 | 1 | 0 | 1 | 0 | 0 | 0 | 1 | 0 | 1 | 2 |
| 0 | 0 | 0 | 0 | 1 | 1 | 0 | 1 | 0 | 1 | 1 | 1 | 0 |
| 0 | 1 | 1 | 0 | 1 | 0 | 0 | 0 | 0 | 0 | 1 | 0 | 1 |
| 0 | 0 | 2 | 1 | 0 | 0 | 0 | 1 | 1 | 0 | 0 | 0 | 1 |
| 0 | 0 | 0 | 0 | 0 | 1 | 1 | 0 | 1 | 1 | 0 | 0 | 1 |
| 0 | 1 | 1 | 1 | 0 | 1 | 0 | 1 | 0 | 1 | 0 | 1 | 0 |
| 0 | 0 | 1 | 0 | 1 | 1 | 1 | 1 | 1 | 0 | 1 | 0 | 0 |
| 1 | 0 | 1 | 0 | 1 | 0 | 0 | 1 | 2 | 1 | 1 | 1 | 0 |
| 0 | 1 | 0 | 1 | 1 | 0 | 0 | 1 | 1 | 1 | 0 | 1 | 0 |
| 1 | 1 | 1 | 1 | 0 | 1 | 1 | 0 | 0 | 0 | 0 | 0 | 0 |
| 3 | 1 | 1 | 0 | 0 | 0 | 0 | 0 | 1 |   |   |   |   |

*Osteolaemus osborni*

|   |   |   |   |   |   |   |   |   |   |   |   |   |
|---|---|---|---|---|---|---|---|---|---|---|---|---|
| ? | ? | 1 | ? | 0 | 0 | 0 | 0 | 0 | 0 | 1 | ? | 0 |
| 0 | 1 | 0 | 1 | 0 | 1 | 0 | 0 | 0 | 1 | 1 | 1 | 0 |
| 0 | 1 | 1 | 1 | 1 | 1 | 2 | 0 | 1 | 1 | 1 | 0 | 0 |
| 1 | 1 | 1 | 1 | 1 | 1 | 1 | 0 | 1 | 1 | 1 | 0 | 0 |
| 2 | 1 | 0 | 1 | 0 | 1 | 0 | 0 | 0 | 0 | 0 | 1 | 2 |
| 0 | 0 | 0 | 0 | 1 | 1 | 0 | 1 | 0 | 1 | 1 | 1 | 0 |
| 0 | 1 | 1 | 0 | 1 | 1 | 0 | 0 | 0 | 0 | 1 | 0 | 1 |
| 0 | 0 | 2 | 1 | 0 | 0 | 0 | 1 | 1 | 0 | 0 | 0 | 1 |
| 0 | 0 | 0 | 0 | 0 | 1 | 1 | 0 | 1 | 1 | 0 | 0 | 1 |
| 0 | 0 | 1 | 0 | 0 | 1 | 0 | 1 | 0 | 1 | 0 | 1 | 0 |
| 0 | 0 | 0 | 0 | 1 | 1 | 1 | 1 | 1 | 0 | 1 | 0 | 0 |
| 1 | 0 | 1 | 0 | 1 | 0 | 0 | 1 | 2 | 1 | 1 | 1 | 0 |
| 0 | 1 | 0 | 1 | 1 | 0 | 0 | 1 | 1 | 1 | 0 | 1 | 0 |
| 1 | 1 | 1 | 1 | 0 | 1 | 1 | 0 | 0 | 0 | 0 | 0 | 0 |
| 3 | 1 | 0 | 0 | 0 | 0 | 0 | 0 | 1 |   |   |   |   |

*Voay robustus*

|   |   |   |   |   |   |   |   |   |   |   |   |   |
|---|---|---|---|---|---|---|---|---|---|---|---|---|
| ? | ? | ? | ? | ? | ? | ? | 0 | ? | ? | ? | ? | ? |
| ? | ? | ? | 0 | ? | ? | ? | 0 | 1 | 1 | ? | ? | ? |
| ? | ? | 1 | 1 | 1 | ? | ? | 1 | 1 | 1 | 0 | ? | ? |
| ? | ? | ? | ? | 1 | ? | ? | ? | 1 | 1 | 1 | 0 | 2 |





|   |   |   |   |   |   |   |   |   |   |   |   |   |
|---|---|---|---|---|---|---|---|---|---|---|---|---|
| 1 | 0 | ? | ? | ? | 1 | ? | ? | ? | 1 | ? | 1 | 1 |
| 2 | ? | ? | 1 | ? | ? | ? | ? | ? | ? | 0 | ? | 2 |
| ? | 0 | 0 | 1 | 1 | 1 | 0 | 1 | 0 | 1 | 1 | ? | ? |
| ? | ? | 0 | 0 | 0 | 2 | 0 | ? | 0 | 0 | 0 | 0 | 1 |
| 0 | 0 | 2 | 1 | 0 | 0 | 0 | 1 | 1 | ? | ? | ? | 1 |
| 0 | 0 | 0 | 0 | 0 | 1 | 1 | 0 | 1 | 0 | 0 | ? | 0 |
| 0 | 0 | ? | 0 | ? | ? | ? | ? | ? | ? | 0 | ? | ? |
| 0 | ? | 0 | 0 | 1 | 1 | 1 | 1 | 1 | 0 | ? | ? | ? |
| ? | ? | 1 | 1 | ? | 0 | ? | ? | 2 | 0 | 1 | 1 | 0 |
| ? | 1 | 1 | 1 | ? | ? | ? | ? | ? | 1 | ? | 1 | 0 |
| ? | ? | 1 | ? | ? | ? | 1 | ? | ? | 0 | 0 | 0 | 0 |
| 3 | ? | ? | ? | 0 | 0 | 0 | 0 | ? |   |   |   |   |

|                       |   |   |   |   |   |   |   |   |   |   |   |   |
|-----------------------|---|---|---|---|---|---|---|---|---|---|---|---|
| Crocodylus megarhinus | ? | ? | ? | ? | ? | ? | ? | 0 | ? | ? | ? | ? |
| ?                     | ? | ? | ? | ? | ? | ? | ? | 0 | 0 | 1 | ? | ? |
| ?                     | ? | ? | ? | ? | ? | ? | ? | ? | ? | ? | ? | ? |
| ?                     | ? | ? | ? | ? | ? | ? | ? | ? | ? | 1 | 1 | 1 |
| 2                     | 1 | 0 | 1 | ? | ? | ? | ? | ? | ? | 0 | 0 | 1 |
| 0                     | 0 | 0 | 0 | ? | ? | 0 | 1 | 0 | 1 | 1 | ? | ? |
| ?                     | ? | 0 | 0 | 1 | 1 | 0 | ? | 0 | 0 | 0 | 0 | ? |
| 0                     | 0 | 2 | 3 | 0 | 0 | 0 | 0 | 1 | 0 | 0 | 0 | 1 |
| ?                     | 0 | 0 | 0 | 0 | ? | ? | 0 | ? | 0 | 0 | 0 | 0 |
| 0                     | 0 | 1 | 1 | 0 | 1 | 0 | 0 | 0 | 1 | 0 | 1 | 2 |
| 0                     | 0 | 0 | 0 | 1 | 1 | 1 | 1 | 1 | 0 | ? | 0 | 0 |
| 2                     | ? | 1 | 1 | ? | 0 | 0 | 1 | 2 | ? | 0 | 1 | 0 |
| 0                     | 1 | 0 | 1 | 0 | ? | 0 | 1 | 1 | 0 | 0 | ? | ? |
| ?                     | 1 | 1 | 1 | 0 | 0 | 1 | 0 | 0 | 0 | 0 | 0 | 0 |
| 3                     | ? | ? | ? | 0 | 0 | 0 | 0 | ? |   |   |   |   |

|                        |   |   |   |   |   |   |   |   |   |   |   |   |
|------------------------|---|---|---|---|---|---|---|---|---|---|---|---|
| Australosuchus clarkae | ? | ? | ? | ? | ? | ? | ? | 0 | ? | ? | ? | ? |
| ?                      | ? | ? | 1 | ? | ? | 0 | ? | ? | ? | 1 | ? | ? |
| ?                      | ? | 1 | 1 | ? | ? | ? | ? | ? | ? | ? | ? | ? |
| 1                      | 0 | ? | ? | ? | 1 | ? | ? | ? | ? | 1 | 1 | 1 |
| ?                      | 1 | 0 | 1 | ? | ? | ? | ? | ? | ? | 0 | 0 | 1 |
| 0                      | 0 | 0 | 0 | 1 | 1 | 0 | 1 | 0 | 1 | 1 | ? | ? |
| ?                      | ? | 0 | 0 | 1 | 1 | 0 | ? | 0 | 0 | 0 | 0 | 1 |
| 1                      | 0 | 2 | 1 | 0 | 0 | 0 | 0 | 1 | 0 | 0 | 0 | 1 |
| 0                      | 0 | 0 | 0 | 0 | 1 | ? | 0 | ? | 0 | 0 | 0 | 0 |
| 0                      | 0 | ? | ? | ? | ? | ? | ? | ? | ? | 1 | 0 | 1 |
| 0                      | 0 | ? | 0 | 1 | 1 | 1 | 1 | 1 | 0 | ? | 0 | 0 |
| 2                      | 0 | 1 | 1 | ? | 0 | 1 | 1 | 2 | 0 | 0 | 1 | 0 |
| 0                      | 1 | 0 | 1 | 0 | 0 | 0 | 1 | 1 | ? | ? | 1 | ? |
| ?                      | 1 | 1 | ? | 0 | 0 | 1 | 0 | 0 | 0 | ? | 0 | 0 |
| 1                      | ? | ? | ? | 0 | 0 | 0 | 0 | ? |   |   |   |   |

|                     |   |   |   |   |   |   |   |   |   |   |   |   |
|---------------------|---|---|---|---|---|---|---|---|---|---|---|---|
| Kambara implexidens | ? | ? | ? | ? | ? | ? | ? | 0 | ? | ? | ? | ? |
| ?                   | ? | ? | ? | ? | ? | ? | ? | 0 | 1 | ? | ? | ? |

|   |   |   |   |   |   |   |   |   |   |   |   |   |
|---|---|---|---|---|---|---|---|---|---|---|---|---|
| ? | ? | 1 | 1 | ? | ? | ? | ? | 1 | 1 | 0 | 0 | ? |
| 1 | 0 | ? | ? | ? | 1 | ? | ? | ? | 1 | 1 | 1 | 0 |
| 2 | 1 | 0 | 1 | ? | ? | ? | ? | ? | 0 | 0 | 1 | 2 |
| 0 | 0 | 0 | 0 | 1 | 1 | 0 | 1 | 0 | 1 | 1 | ? | ? |
| ? | ? | 0 | 0 | 1 | 1 | 0 | ? | 0 | 0 | 0 | 0 | 1 |
| 1 | 0 | 2 | 1 | 0 | 0 | 0 | 0 | 1 | 0 | 0 | 0 | 1 |
| 0 | 0 | 0 | 0 | 0 | 1 | ? | 0 | 1 | 0 | 0 | 0 | 0 |
| 0 | 0 | 1 | 0 | 0 | 1 | 0 | 0 | 0 | 1 | 0 | 1 | 0 |
| 0 | 0 | 0 | 0 | 1 | 1 | 1 | 1 | 1 | 0 | ? | 0 | 0 |
| 2 | 0 | 1 | 1 | ? | 0 | 0 | 1 | 2 | 0 | 0 | 1 | 0 |
| 0 | 1 | 0 | 1 | 0 | 0 | 0 | 1 | 1 | 1 | 0 | 1 | ? |
| 1 | 1 | 1 | 1 | 0 | 0 | 1 | 0 | 0 | 0 | 0 | 0 | 0 |
| 1 | ? | ? | ? | 0 | 0 | 0 | 0 | 1 |   |   |   |   |

Trilophosuchus rackhami

|   |   |   |   |   |   |   |   |   |   |   |   |   |
|---|---|---|---|---|---|---|---|---|---|---|---|---|
|   |   |   | ? | ? | ? | ? | ? | ? | ? | ? | ? | ? |
| ? | ? | ? | ? | ? | ? | ? | ? | ? | ? | ? | ? | ? |
| ? | ? | ? | ? | ? | ? | ? | ? | ? | ? | ? | ? | ? |
| ? | ? | ? | ? | ? | ? | ? | ? | ? | ? | ? | ? | ? |
| ? | ? | ? | ? | ? | ? | ? | ? | ? | ? | ? | ? | ? |
| ? | ? | ? | 0 | ? | ? | ? | ? | ? | 0 | ? | ? | ? |
| ? | ? | ? | 2 | ? | 0 | ? | ? | 0 | ? | ? | 0 | ? |
| 1 | 0 | 0 | 0 | ? | ? | ? | ? | 0 | ? | 1 | ? | 0 |
| 0 | 0 | 0 | 0 | 1 | 0 | 1 | 0 | ? | ? | ? | 0 | 1 |
| ? | 0 | ? | ? | 0 | 1 | 1 | 1 | 1 | 1 | 0 | ? | ? |
| 1 | 2 | 0 | 1 | 1 | 1 | 0 | 1 | 1 | 2 | 1 | 0 | 1 |
| 0 | 0 | 0 | 0 | 1 | 0 | 2 | 0 | 1 | 1 | 1 | 0 | 1 |
| ? | 1 | 1 | 1 | ? | 0 | ? | 1 | 0 | 0 | 0 | ? | 0 |
| 0 | 1 | ? | ? | ? | ? | ? | ? | 0 | ? |   |   |   |

Quinkana spp

|   |     |     |   |   |     |   |   |   |   |   |   |   |
|---|-----|-----|---|---|-----|---|---|---|---|---|---|---|
|   | ?   | ?   | ? | ? | ?   | ? | ? | ? | ? | ? | ? | ? |
| ? | ?   | ?   | ? | ? | ?   | ? | ? | ? | ? | ? | ? | ? |
| ? | ?   | ?   | ? | ? | ?   | ? | ? | ? | ? | ? | ? | ? |
| ? | ?   | ?   | ? | ? | ?   | ? | ? | ? | ? | ? | ? | ? |
| ? | ?   | 1   | ? | ? | ?   | ? | ? | ? | ? | ? | ? | ? |
| ? | ?   | ?   | ? | ? | ?   | ? | ? | 1 | ? | ? | ? | ? |
| ? | 2   | 1   | 0 | 1 | 0   | ? | 0 | 0 | 0 | 0 | ? | 1 |
| 0 | 0/2 | 1/5 | 0 | 0 | 0/1 | 0 | 1 | 0 | 0 | 0 | 1 | 0 |
| 0 | 0   | 0   | 0 | ? | ?   | ? | ? | 0 | ? | 0 | ? | ? |
| ? | ?   | ?   | ? | ? | ?   | ? | ? | 1 | ? | ? | 1 | 0 |
| 0 | ?   | 0   | 1 | 1 | 1   | ? | 1 | 0 | ? | 0 | 0 | 2 |
| 0 | 1   | 1   | 1 | 0 | 0   | 1 | 2 | 1 | 0 | 1 | 0 | 0 |
| 1 | 0   | 1   | 0 | 2 | ?   | 1 | 1 | 1 | 0 | 1 | ? | 1 |
| 1 | ?   | ?   | 0 | 1 | ?   | 0 | 0 | 0 | ? | ? | ? | 1 |
| ? | ?   | ?   | ? | ? | ?   | ? | ? |   |   |   |   |   |

|                      |   |   |   |   |   |   |   |   |   |   |   |   |
|----------------------|---|---|---|---|---|---|---|---|---|---|---|---|
| Tomistoma schlegelii | 0 | 2 | 1 | 0 | 0 | 0 | 0 | 0 | 0 | 1 | ? | 0 |
| 0                    | 1 | 0 | 1 | 0 | 0 | 0 | 1 | 0 | 1 | 1 | 0 | 0 |
| 0                    | 1 | 1 | 1 | 1 | 1 | 1 | 0 | 1 | 1 | 0 | 0 | 0 |
| 1                    | 0 | 1 | 3 | 0 | 1 | 1 | 0 | 1 | 1 | 1 | 2 | 2 |
| ?                    | 1 | 0 | 4 | 0 | 0 | 0 | 0 | 0 | 1 | 0 | 0 | 2 |
| 0                    | 0 | 0 | 0 | 0 | 0 | 0 | 1 | 0 | 1 | 0 | 0 | 0 |
| 0                    | 1 | 0 | 0 | 1 | 2 | 0 | 0 | 0 | 0 | 0 | 0 | 1 |
| 1                    | 0 | 2 | 1 | 0 | 0 | 0 | 0 | 1 | 0 | 1 | 0 | 1 |
| 0                    | 0 | 0 | 0 | 0 | 1 | 1 | 0 | 1 | 0 | 0 | 0 | 1 |
| 0                    | 0 | 1 | 0 | 0 | 1 | 0 | 0 | 0 | 1 | 0 | 1 | 1 |
| 0                    | 0 | 0 | 0 | 1 | 1 | 1 | 1 | 1 | 0 | 0 | 0 | 0 |
| 0                    | 1 | 1 | 0 | 1 | 0 | 0 | 1 | 2 | 1 | 0 | 1 | 0 |
| 0                    | 1 | 0 | 1 | 0 | 0 | 0 | 1 | 1 | 0 | 0 | 1 | 0 |
| 1                    | 1 | 1 | 1 | 0 | 0 | 1 | 0 | 0 | 0 | 0 | 0 | 0 |
| 3                    | 1 | 1 | 1 | 0 | 0 | 0 | 0 | 1 |   |   |   |   |

|                      |   |   |   |   |   |   |   |   |   |   |   |   |
|----------------------|---|---|---|---|---|---|---|---|---|---|---|---|
| Tomistoma lusitanica | ? | ? | ? | ? | ? | ? | ? | 0 | ? | ? | ? | ? |
| ?                    | ? | ? | ? | ? | ? | ? | ? | 0 | 1 | ? | ? | ? |
| ?                    | ? | ? | ? | ? | ? | ? | ? | ? | ? | ? | ? | ? |
| 1                    | 0 | ? | ? | ? | 1 | ? | ? | ? | 1 | ? | ? | 2 |
| ?                    | ? | ? | 4 | ? | ? | ? | ? | ? | 0 | 0 | ? | 2 |
| 0                    | 0 | 0 | 0 | ? | ? | 0 | 1 | 0 | 1 | ? | ? | ? |
| ?                    | ? | 0 | 0 | 1 | 2 | 0 | ? | 0 | 0 | 0 | 0 | ? |
| 1                    | 0 | 2 | 1 | ? | 0 | 0 | 0 | 1 | 0 | 1 | ? | 1 |
| 0                    | 0 | 0 | 0 | 0 | 1 | 1 | 0 | ? | 0 | 0 | 0 | 0 |
| 1                    | 0 | 1 | 0 | 0 | 1 | 0 | 0 | 0 | 1 | 0 | 1 | 0 |
| 0                    | 0 | 0 | 0 | 1 | 1 | 1 | 1 | 1 | 0 | ? | 0 | 0 |
| 0                    | 1 | ? | 1 | ? | 1 | 0 | 1 | 2 | 1 | 0 | 1 | 0 |
| 0                    | 1 | 0 | 1 | 0 | 0 | 0 | 1 | 1 | 0 | 0 | 1 | ? |
| ?                    | 1 | 1 | 1 | 0 | 0 | 1 | 0 | 0 | 0 | 0 | 0 | 0 |
| 3                    | ? | ? | ? | 0 | 0 | 0 | 0 | 1 |   |   |   |   |

|                     |   |   |   |   |   |   |   |   |   |   |   |   |
|---------------------|---|---|---|---|---|---|---|---|---|---|---|---|
| Tomistoma petrolica | ? | ? | ? | ? | ? | ? | ? | ? | ? | ? | ? | ? |
| ?                   | ? | ? | ? | ? | ? | ? | ? | ? | ? | ? | ? | ? |
| ?                   | ? | ? | 1 | ? | ? | ? | ? | ? | ? | ? | ? | ? |
| ?                   | ? | ? | ? | ? | ? | ? | ? | ? | ? | ? | ? | ? |
| ?                   | ? | 0 | 4 | ? | ? | ? | ? | ? | ? | 0 | 0 | 2 |
| 0                   | ? | 0 | ? | 0 | 1 | ? | 1 | ? | 1 | 0 | ? | ? |
| ?                   | ? | 0 | 0 | ? | ? | ? | ? | ? | ? | ? | ? | ? |
| ?                   | ? | 2 | ? | 0 | 0 | ? | 0 | ? | ? | 0 | ? | ? |
| ?                   | 0 | 0 | 0 | 0 | 1 | ? | ? | ? | 0 | ? | 0 | 0 |
| 1                   | 0 | 1 | 0 | 0 | 1 | ? | ? | ? | ? | ? | ? | 1 |
| ?                   | 0 | 0 | ? | 0 | ? | 1 | 1 | 1 | 0 | ? | 0 | ? |
| 2                   | ? | 0 | ? | ? | 0 | ? | ? | 2 | 0 | 0 | ? | 0 |
| 0                   | 0 | 0 | 1 | 0 | 0 | ? | ? | ? | ? | ? | ? | ? |
| ?                   | ? | 1 | ? | ? | ? | 1 | ? | ? | ? | ? | 0 | 0 |
| 3                   | ? | ? | ? | 0 | 0 | 0 | 0 | ? |   |   |   |   |

|                               |   |   |   |   |   |   |   |   |   |   |   |   |   |
|-------------------------------|---|---|---|---|---|---|---|---|---|---|---|---|---|
| Toyotamaphimaea machikanensis | 0 | 0 | 1 | 0 | 0 | 1 | 0 | 0 | 1 | 0 | 0 | ? |   |
| ?                             | 1 | 1 | 1 | 1 | 1 | 1 | 0 | 0 | 1 | 0 | 1 | 1 |   |
| 0                             | 0 | 0 | 1 | 1 | 1 | 1 | 1 | 1 | 0 | 1 | 1 | 0 |   |
| 0                             | ? | 0 | 0 | ? | ? | ? | 1 | ? | ? | ? | ? | ? |   |
| 2                             | 2 | ? | ? | 0 | 4 | ? | ? | ? | ? | ? | ? | 1 | 0 |
| 0                             | 2 | 0 | ? | 0 | 0 | 0 | 0 | ? | 1 | 0 | 1 | 0 |   |
| 0                             | 0 | ? | ? | 0 | 0 | 1 | 2 | 0 | ? | 0 | 0 | 0 |   |
| 0                             | 1 | 1 | 0 | 0 | 4 | 0 | 0 | 0 | 0 | 1 | 0 | ? |   |
| ?                             | ? | 0 | 0 | 0 | 0 | 0 | ? | ? | ? | ? | 0 | 0 |   |
| 0                             | 0 | ? | 0 | 1 | 0 | 0 | 1 | 0 | 0 | 0 | 0 | ? |   |
| 1                             | 0 | 0 | 0 | 0 | 0 | 0 | 1 | 1 | 1 | 1 | 0 | ? |   |
| ?                             | 0 | 0 | ? | 1 | ? | ? | 1 | ? | ? | 2 | 1 | 0 |   |
| 1                             | 0 | ? | 1 | 0 | 1 | 0 | ? | ? | ? | ? | ? | ? |   |
| ?                             | ? | ? | ? | 1 | 1 | 0 | 0 | 1 | 0 | ? | 0 | 0 |   |
| 0                             | 0 | 3 | ? | ? | ? | 0 | 0 | 0 | 0 | 1 |   |   |   |

|                   |   |   |   |   |   |   |   |   |   |   |   |   |
|-------------------|---|---|---|---|---|---|---|---|---|---|---|---|
| Penghusuchus pani | 0 | 0 | 0 | 0 | 0 | 0 | 0 | 1 | 1 | 1 | 0 | 0 |
| 0                 | 1 | 0 | ? | ? | 1 | 0 | 1 | 0 | 1 | ? | ? | 1 |
| 0                 | 1 | 1 | 1 | 1 | ? | 1 | ? | 0 | 1 | 0 | 0 | ? |
| 0                 | 0 | ? | ? | ? | 1 | ? | ? | ? | 1 | ? | 2 | 2 |
| ?                 | 1 | 0 | 4 | ? | ? | ? | ? | ? | 0 | 0 | ? | 2 |
| 0                 | ? | 0 | 0 | 0 | 1 | 0 | 1 | ? | 0 | ? | 0 | 0 |
| ?                 | ? | 0 | ? | ? | ? | ? | ? | 0 | ? | ? | ? | ? |
| ?                 | ? | 2 | 5 | 0 | 0 | 0 | 0 | 1 | ? | 0 | ? | ? |
| 0                 | 0 | 0 | 0 | 0 | 1 | 1 | 1 | 1 | 0 | 0 | 0 | 0 |
| 1                 | 0 | 0 | 0 | 0 | 1 | 0 | 1 | 0 | 0 | 0 | 1 | 1 |
| 0                 | 2 | 0 | 0 | 0 | 1 | 1 | 1 | 0 | 0 | ? | ? | ? |
| ?                 | ? | ? | ? | 1 | ? | ? | ? | 2 | ? | ? | ? | ? |
| ?                 | 1 | 0 | 1 | 0 | ? | ? | ? | ? | ? | ? | 0 | ? |
| ?                 | 0 | 1 | 1 | ? | 0 | 1 | 0 | 0 | 1 | 0 | 0 | 0 |
| 3                 | ? | ? | ? | 0 | 0 | 0 | 0 | ? |   |   |   |   |

|                              |   |   |   |   |   |   |   |   |   |   |   |   |
|------------------------------|---|---|---|---|---|---|---|---|---|---|---|---|
| Gavialosuchus eggenbergensis | ? | ? | ? | ? | ? | ? | ? | ? | ? | ? | ? | ? |
| ?                            | ? | ? | ? | ? | ? | ? | ? | ? | ? | 1 | ? | ? |
| ?                            | ? | ? | ? | ? | ? | ? | ? | ? | ? | ? | ? | ? |
| ?                            | ? | ? | ? | ? | ? | ? | ? | ? | ? | ? | ? | ? |
| ?                            | ? | ? | ? | ? | ? | ? | ? | ? | ? | ? | ? | ? |
| ?                            | ? | ? | 0 | 0 | 1 | 2 | 0 | ? | 0 | 0 | 0 | 0 |
| ?                            | 1 | 0 | 2 | 4 | 0 | 0 | 0 | 0 | 1 | 0 | 0 | ? |
| ?                            | 0 | 0 | 0 | 0 | 0 | ? | ? | ? | ? | 0 | 0 | ? |
| 0                            | 1 | 0 | 1 | 0 | 0 | 1 | 0 | 0 | 0 | ? | 0 | 1 |
| 2                            | 0 | 0 | 0 | ? | 0 | ? | 1 | 1 | 1 | 0 | ? | 0 |
| ?                            | ? | ? | ? | ? | ? | 1 | ? | 1 | 2 | 1 | 0 | 1 |
| 0                            | ? | 1 | 0 | 1 | 0 | 0 | ? | ? | ? | ? | ? | ? |
| ?                            | ? | 1 | 1 | ? | ? | ? | 1 | 0 | 0 | 0 | 0 | 0 |
| 0                            | 3 | ? | ? | ? | 0 | 0 | 0 | 0 | ? |   |   |   |

|                       |   |   |   |   |   |   |   |   |   |   |   |   |   |
|-----------------------|---|---|---|---|---|---|---|---|---|---|---|---|---|
| Paratomistoma courtii | ? | ? | ? | ? | ? | ? | ? | ? | ? | ? | ? | ? | ? |
| ?                     | ? | ? | ? | ? | ? | ? | ? | ? | ? | ? | ? | ? | ? |
| ?                     | ? | ? | ? | ? | ? | ? | ? | ? | ? | ? | ? | ? | ? |
| ?                     | ? | ? | ? | ? | ? | ? | ? | ? | ? | 0 | ? | ? | 2 |
| 0                     | ? | 0 | 0 | 0 | 0 | 0 | 1 | 0 | 1 | 0 | ? | ? | ? |
| ?                     | ? | 0 | 0 | ? | ? | ? | ? | ? | ? | ? | ? | ? | ? |
| ?                     | ? | 2 | ? | ? | 0 | ? | 0 | ? | ? | ? | ? | ? | ? |
| ?                     | ? | 0 | 0 | 0 | 1 | ? | 0 | ? | ? | ? | ? | ? | ? |
| ?                     | ? | ? | ? | ? | ? | ? | ? | ? | ? | ? | ? | ? | 0 |
| 0                     | 0 | 0 | ? | 1 | ? | ? | 1 | 1 | ? | ? | ? | ? | ? |
| ?                     | 1 | ? | ? | ? | 1 | ? | ? | 2 | 0 | 0 | 1 | 0 | ? |
| 0                     | 0 | 0 | 1 | 0 | 0 | 0 | ? | 1 | 0 | 0 | 0 | ? | ? |
| 1                     | 0 | 1 | ? | 0 | ? | 1 | 0 | 0 | ? | ? | 0 | 0 | 0 |
| ?                     | ? | ? | ? | ? | ? | ? | 0 | ? |   |   |   |   |   |

|                         |   |   |   |   |   |   |   |   |   |   |   |   |   |
|-------------------------|---|---|---|---|---|---|---|---|---|---|---|---|---|
| Megadontosuchus arduini | ? | ? | ? | ? | ? | ? | ? | ? | ? | ? | ? | ? | ? |
| ?                       | ? | ? | ? | ? | ? | ? | ? | ? | ? | 0 | 1 | ? | ? |
| ?                       | ? | ? | ? | ? | ? | ? | ? | ? | ? | ? | ? | ? | ? |
| ?                       | 1 | ? | ? | ? | ? | ? | ? | ? | ? | ? | 1 | 1 | 2 |
| 0                       | ? | ? | ? | ? | ? | ? | ? | ? | ? | ? | 0 | ? | ? |
| 2                       | 0 | ? | ? | ? | ? | ? | 0 | ? | ? | ? | ? | 1 | ? |
| ?                       | ? | ? | 0 | 0 | 1 | ? | 0 | ? | 0 | 0 | 0 | 0 | ? |
| 1                       | 1 | 0 | 2 | 1 | 0 | 0 | 0 | 0 | 1 | ? | ? | ? | ? |
| ?                       | ? | ? | 0 | 0 | 0 | ? | ? | ? | 2 | 0 | ? | ? | ? |
| ?                       | 1 | ? | ? | ? | ? | ? | ? | ? | ? | ? | ? | ? | ? |
| ?                       | 0 | 0 | 0 | ? | 0 | 1 | 1 | 1 | 1 | 0 | ? | ? | ? |
| ?                       | 0 | ? | ? | ? | ? | 1 | ? | ? | 2 | 0 | 0 | 1 | ? |
| ?                       | ? | 1 | 0 | 1 | ? | ? | ? | ? | ? | ? | ? | ? | ? |
| ?                       | ? | ? | 1 | ? | ? | ? | 1 | ? | ? | ? | ? | ? | 0 |
| 0                       | ? | ? | ? | ? | 0 | 0 | 0 | 0 | ? |   |   |   |   |

|                    |   |   |   |   |   |   |   |   |   |   |   |   |   |
|--------------------|---|---|---|---|---|---|---|---|---|---|---|---|---|
| Tomistoma cairense | ? | ? | ? | ? | ? | ? | ? | ? | ? | ? | ? | ? | ? |
| ?                  | ? | ? | ? | ? | ? | ? | ? | ? | ? | ? | ? | ? | ? |
| ?                  | ? | ? | ? | ? | ? | ? | ? | ? | ? | ? | ? | ? | ? |
| ?                  | ? | ? | ? | ? | ? | ? | ? | ? | ? | 1 | ? | ? | 2 |
| ?                  | ? | ? | 4 | ? | ? | ? | ? | ? | ? | ? | ? | ? | 2 |
| 0                  | 0 | 0 | 0 | 0 | 1 | ? | 1 | 0 | 1 | 0 | ? | ? | ? |
| ?                  | ? | 0 | 0 | ? | 2 | 0 | ? | 0 | ? | ? | ? | ? | ? |
| ?                  | 0 | 2 | 5 | ? | 0 | ? | ? | 1 | ? | 0 | ? | ? | ? |
| ?                  | ? | 0 | 0 | 0 | ? | ? | 0 | ? | 0 | 0 | 0 | 0 | 0 |
| 1                  | 0 | 1 | 0 | 0 | 1 | 0 | 0 | 0 | 1 | 0 | ? | ? | 0 |
| 0                  | ? | 0 | ? | 0 | 1 | 1 | 1 | 1 | 0 | ? | ? | ? | ? |
| 0                  | 1 | ? | ? | ? | 1 | 0 | ? | 2 | 0 | 0 | 1 | 0 | ? |
| 0                  | 1 | 0 | 1 | 0 | 0 | 0 | 1 | ? | ? | 0 | ? | ? | ? |
| ?                  | 1 | 1 | ? | 0 | 0 | 1 | ? | 0 | 0 | 0 | 0 | 0 | 0 |
| 3                  | ? | ? | ? | 0 | 0 | 0 | 0 | ? |   |   |   |   |   |

|             |         |   |   |   |   |   |   |   |   |   |   |   |   |
|-------------|---------|---|---|---|---|---|---|---|---|---|---|---|---|
| Thecachamps | antiqua | 0 | 2 | 0 | 0 | 0 | 0 | 0 | 0 | 0 | ? | ? | 0 |
| 0           | 1       | 0 | 1 | 0 | ? | 0 | 0 | 0 | 1 | 1 | 0 | 1 |   |
| 0           | 1       | 1 | 1 | ? | 1 | ? | ? | 1 | 1 | ? | 0 | ? |   |
| 0           | 0       | ? | ? | ? | 1 | ? | ? | ? | 1 | 1 | 2 | 2 |   |
| ?           | ?       | ? | 4 | ? | 1 | 0 | 0 | ? | ? | ? | ? | 2 |   |
| 0           | 0       | 0 | 0 | 3 | 1 | ? | 1 | 0 | 1 | ? | 0 | ? |   |
| ?           | ?       | 0 | 0 | 1 | 2 | 0 | ? | 0 | 0 | 0 | 0 | 1 |   |
| 1           | 0       | 2 | 1 | 0 | 0 | 0 | 0 | 1 | 0 | 0 | ? | 1 |   |
| 0           | 0       | 0 | 0 | 0 | ? | ? | 0 | ? | 0 | 0 | 0 | 0 |   |
| 1           | 0       | 1 | ? | 0 | 1 | 0 | 0 | 0 | 1 | 0 | 1 | 1 |   |
| 0           | 0       | 0 | 0 | 0 | 1 | 1 | 1 | 1 | 0 | ? | ? | ? |   |
| 0           | 1       | 1 | ? | ? | 1 | 0 | 1 | 2 | 0 | 0 | 1 | 0 |   |
| 0           | 1       | 0 | 1 | 0 | 1 | 0 | ? | ? | 0 | 0 | ? | ? |   |
| ?           | 1       | 1 | 1 | 0 | 0 | 1 | 0 | 0 | ? | 2 | 0 | 0 |   |
| 3           | ?       | ? | ? | 0 | 0 | 0 | 0 | 1 |   |   |   |   |   |

|             |           |   |   |   |   |   |   |   |   |   |   |   |
|-------------|-----------|---|---|---|---|---|---|---|---|---|---|---|
| Thecachamps | americana | ? | ? | ? | ? | ? | ? | ? | ? | ? | ? | ? |
| ?           | ?         | ? | ? | 1 | ? | ? | ? | ? | 0 | 1 | ? | 0 |
| 0           | 0         | ? | 1 | 1 | 1 | 1 | ? | ? | 1 | 1 | 0 | 0 |
| ?           | 0         | 0 | ? | ? | ? | 1 | ? | ? | ? | 1 | 1 | 2 |
| 2           | ?         | ? | ? | 4 | ? | ? | ? | ? | ? | 0 | 0 | 0 |
| 2           | 0         | ? | 0 | 0 | 3 | 1 | ? | 1 | 0 | 1 | 0 | ? |
| ?           | ?         | ? | 0 | 0 | 1 | 2 | 0 | ? | 0 | 0 | 0 | 0 |
| 1           | 1         | 0 | 2 | 1 | 0 | 0 | 0 | 0 | 1 | 0 | 0 | ? |
| 1           | 0         | 0 | 0 | 0 | 0 | ? | ? | ? | ? | 0 | 0 | 0 |
| 0           | 1         | 0 | 0 | 0 | 0 | 1 | 0 | 0 | 0 | ? | ? | ? |
| 1           | 0         | 0 | 0 | ? | 0 | 1 | 1 | 1 | 1 | 0 | ? | 0 |
| 0           | 0         | ? | 1 | 0 | ? | 1 | 0 | 1 | 2 | 0 | 0 | 1 |
| 0           | 0         | 1 | 0 | 1 | 0 | 1 | ? | ? | ? | 0 | ? | ? |
| ?           | ?         | 1 | 1 | 1 | 0 | 0 | 1 | 0 | 0 | ? | 2 | 0 |
| 0           | 3         | ? | ? | ? | 0 | 0 | 0 | 0 | 1 |   |   |   |

|             |             |   |   |   |   |   |   |   |   |   |   |   |
|-------------|-------------|---|---|---|---|---|---|---|---|---|---|---|
| Thecachamps | carolinense | ? | ? | ? | ? | 0 | 0 | 0 | 0 | 0 | ? | ? |
| ?           | ?           | ? | 0 | 1 | 0 | ? | 0 | 1 | 0 | 1 | 1 | 0 |
| ?           | 0           | 1 | ? | ? | ? | ? | ? | ? | 1 | ? | 0 | 0 |
| ?           | 0           | 0 | ? | ? | ? | 1 | ? | ? | ? | 1 | 1 | 2 |
| 2           | ?           | ? | 0 | 4 | ? | ? | ? | ? | ? | 0 | 0 | 0 |
| 2           | 0           | ? | 0 | 1 | 3 | 1 | ? | 1 | 0 | 1 | 0 | ? |
| ?           | ?           | ? | 0 | 0 | 1 | 2 | 0 | ? | 0 | 0 | 0 | 0 |
| 1           | 1           | 0 | 2 | 1 | 0 | 0 | 0 | 0 | 1 | ? | ? | ? |
| ?           | 0           | 0 | 0 | 0 | 0 | ? | ? | ? | ? | 0 | ? | 0 |
| 0           | 1           | 0 | 1 | 0 | 0 | 1 | 0 | 0 | 0 | ? | 0 | 1 |
| ?           | 0           | 0 | 0 | ? | 0 | ? | 1 | 1 | 1 | 0 | ? | ? |
| ?           | 0           | ? | ? | ? | ? | 1 | ? | ? | 2 | 0 | 0 | 1 |
| 0           | ?           | 1 | 0 | 1 | 0 | 1 | ? | ? | ? | ? | ? | ? |
| ?           | ?           | ? | 1 | 1 | 0 | 0 | 1 | 0 | 0 | ? | 2 | 0 |
| 0           | 3           | ? | ? | ? | 0 | 0 | 0 | 0 | ? |   |   |   |

|                          |   |   |   |   |   |   |   |   |   |   |   |   |
|--------------------------|---|---|---|---|---|---|---|---|---|---|---|---|
| Dollosuchoides densmorei | 0 | 0 | 1 | ? | ? | ? | 0 | ? | ? | ? |   |   |
| 1                        | 1 | 1 | 0 | 1 | 0 | ? | 0 | 0 | 0 | 1 | ? | 0 |
| ?                        | 0 | 0 | 1 | 1 | 1 | 1 | ? | ? | 1 | ? | 0 | 0 |
| ?                        | ? | ? | ? | ? | ? | ? | ? | ? | ? | 1 | 1 | 2 |
| 0                        | ? | ? | ? | 0 | ? | ? | ? | ? | ? | 0 | 0 | 0 |
| 2                        | 0 | 0 | ? | 0 | ? | ? | 0 | 1 | 0 | 1 | ? | ? |
| ?                        | ? | ? | 0 | 0 | 1 | 2 | 0 | ? | 0 | 0 | ? | 0 |
| ?                        | 1 | 0 | 2 | 1 | 0 | 0 | 0 | 0 | 1 | 0 | 0 | ? |
| ?                        | 0 | 0 | 0 | 0 | 0 | ? | ? | ? | ? | 0 | 1 | ? |
| 0                        | 1 | 0 | 1 | 0 | 0 | 1 | 0 | 0 | 0 | 1 | 0 | 1 |
| 1                        | 0 | 0 | 0 | ? | 0 | 1 | 1 | 1 | 1 | 0 | ? | ? |
| ?                        | ? | ? | ? | ? | ? | 1 | ? | ? | 2 | 0 | 0 | 1 |
| 0                        | ? | 1 | 0 | 1 | 0 | 0 | 0 | 1 | ? | ? | ? | ? |
| ?                        | ? | ? | 1 | 0 | ? | 0 | 1 | 0 | 0 | 0 | ? | 0 |
| 0                        | 3 | ? | ? | ? | 0 | 0 | 0 | 0 | 1 |   |   |   |

|                      |   |   |   |   |   |   |   |   |   |   |   |   |
|----------------------|---|---|---|---|---|---|---|---|---|---|---|---|
| Kentisuchus spenceri | ? | ? | ? | ? | ? | ? | ? | 0 | ? | ? | ? | ? |
| ?                    | ? | ? | ? | ? | ? | ? | ? | ? | ? | ? | ? | ? |
| ?                    | ? | ? | ? | ? | ? | ? | ? | ? | ? | ? | ? | ? |
| ?                    | ? | ? | ? | ? | ? | ? | ? | ? | ? | 1 | ? | ? |
| ?                    | ? | ? | 0 | ? | ? | ? | ? | ? | 0 | ? | ? | 2 |
| 0                    | 0 | 0 | ? | 1 | 1 | 0 | 1 | ? | 1 | 1 | ? | ? |
| ?                    | ? | 0 | 0 | 1 | 1 | 0 | ? | 0 | 0 | 0 | 0 | ? |
| 1                    | 0 | 2 | 1 | 0 | 0 | 0 | 0 | 1 | 0 | 0 | ? | ? |
| ?                    | 0 | 0 | 0 | 0 | ? | ? | 0 | ? | 0 | 1 | 0 | 0 |
| 1                    | 0 | 1 | 0 | 0 | 1 | 0 | 0 | ? | 1 | 0 | 1 | 1 |
| 0                    | 0 | 0 | ? | 1 | 1 | 1 | 1 | 1 | 0 | ? | ? | ? |
| ?                    | ? | ? | 0 | ? | 0 | ? | ? | 2 | 0 | 0 | 1 | 0 |
| ?                    | 1 | 0 | 1 | 0 | 0 | ? | ? | ? | ? | ? | ? | ? |
| 1                    | 1 | 1 | ? | 0 | ? | 1 | 0 | 0 | ? | 0 | ? | 0 |
| 3                    | ? | ? | ? | 0 | 0 | 0 | 0 | ? |   |   |   |   |

|                               |   |   |   |   |   |   |   |   |   |   |   |   |
|-------------------------------|---|---|---|---|---|---|---|---|---|---|---|---|
| Brachyuranochampsia eversolei | ? | ? | ? | ? | ? | ? | ? | ? | ? | ? | ? | ? |
| ?                             | ? | ? | ? | ? | ? | ? | ? | ? | ? | ? | ? | ? |
| ?                             | ? | ? | ? | ? | ? | ? | ? | ? | ? | ? | ? | ? |
| ?                             | ? | ? | ? | ? | ? | ? | ? | ? | ? | ? | ? | ? |
| ?                             | ? | ? | ? | ? | ? | ? | ? | ? | ? | ? | ? | ? |
| ?                             | ? | ? | 0 | 0 | 1 | 1 | ? | ? | 0 | 0 | ? | ? |
| ?                             | 1 | 0 | 2 | 1 | 0 | 0 | 0 | 0 | 1 | 0 | 0 | ? |
| ?                             | 0 | 0 | 0 | 0 | 0 | ? | ? | 0 | ? | 0 | ? | 0 |
| ?                             | ? | 0 | 1 | 1 | 0 | 1 | 0 | 0 | 0 | 1 | 0 | 1 |
| 0                             | 0 | 0 | 1 | ? | 1 | 1 | 1 | 1 | 0 | 0 | ? | ? |
| ?                             | 2 | ? | 0 | 0 | ? | 0 | ? | 1 | 2 | 1 | 0 | 1 |
| 0                             | ? | 1 | 0 | 1 | 0 | 0 | 0 | ? | ? | ? | ? | ? |
| ?                             | ? | 1 | 1 | 0 | 0 | 0 | 1 | 0 | 0 | 0 | 0 | 0 |
| 0                             | 3 | ? | ? | ? | 0 | 0 | 0 | 0 | ? |   |   |   |



|                 |   |   |   |   |   |   |   |   |   |   |   |   |
|-----------------|---|---|---|---|---|---|---|---|---|---|---|---|
| Crocodylus acer | ? | ? | ? | ? | ? | ? | ? | ? | ? | ? | ? | ? |
| ?               | ? | ? | ? | ? | ? | ? | ? | ? | ? | ? | ? | ? |
| ?               | ? | ? | ? | ? | ? | ? | ? | ? | ? | ? | ? | ? |
| ?               | ? | ? | ? | ? | ? | ? | ? | ? | ? | ? | ? | ? |
| ?               | ? | ? | ? | ? | ? | ? | ? | ? | ? | ? | ? | ? |
| ?               | ? | 0 | 0 | 1 | 1 | 0 | ? | 0 | 0 | 0 | 0 | ? |
| 1               | 0 | 2 | 1 | 0 | 0 | 0 | 0 | 1 | 0 | 0 | ? | ? |
| 0               | 0 | 0 | 0 | 0 | 1 | ? | ? | ? | 0 | 0 | 0 | 1 |
| 0               | 0 | ? | 1 | 0 | 1 | 0 | 0 | 0 | 1 | 0 | 1 | 0 |
| 0               | 0 | 1 | 0 | 1 | 1 | 1 | 1 | 0 | 0 | ? | 0 | 0 |
| 2               | ? | 0 | 1 | ? | 0 | 0 | ? | 2 | 0 | 0 | 1 | 0 |
| 0               | 1 | 0 | 1 | 0 | 0 | 0 | 1 | ? | ? | 0 | ? | ? |
| 1               | 1 | 1 | 0 | 0 | 0 | 1 | 0 | 0 | 0 | 0 | 0 | 0 |
| 3               | ? | ? | ? | ? | 0 | 0 | 0 | ? |   |   |   |   |

|                       |   |   |   |   |   |   |   |   |   |   |   |   |
|-----------------------|---|---|---|---|---|---|---|---|---|---|---|---|
| Asiatosuchus grangeri | ? | ? | ? | ? | ? | ? | ? | ? | ? | ? | ? | ? |
| ?                     | ? | ? | ? | ? | ? | ? | ? | ? | ? | ? | ? | ? |
| ?                     | ? | ? | ? | ? | ? | ? | ? | ? | ? | ? | ? | ? |
| ?                     | ? | ? | ? | ? | ? | ? | ? | ? | 1 | ? | ? | 0 |
| ?                     | 1 | 0 | 1 | ? | ? | ? | ? | ? | ? | 0 | ? | 2 |
| 0                     | 0 | 0 | ? | ? | ? | ? | 1 | 0 | 1 | ? | ? | ? |
| ?                     | ? | 0 | ? | ? | ? | 0 | ? | ? | ? | ? | ? | ? |
| ?                     | ? | 1 | ? | ? | 0 | ? | ? | ? | ? | ? | ? | ? |
| 1                     | ? | ? | ? | ? | ? | ? | ? | ? | ? | ? | ? | ? |
| ?                     | ? | ? | ? | ? | ? | ? | ? | ? | ? | ? | ? | ? |
| 0                     | 0 | 0 | ? | ? | ? | 1 | 1 | 0 | ? | ? | ? | ? |
| ?                     | ? | ? | ? | ? | ? | ? | ? | 2 | 0 | ? | ? | ? |
| ?                     | ? | 0 | ? | ? | ? | ? | ? | ? | ? | ? | ? | ? |
| ?                     | ? | ? | ? | ? | ? | ? | ? | ? | ? | ? | ? | ? |
| ?                     | ? | ? | ? | ? | ? | ? | 0 | ? |   |   |   |   |

|                          |   |   |   |   |   |   |   |   |   |   |   |   |
|--------------------------|---|---|---|---|---|---|---|---|---|---|---|---|
| Crocodylus depressifrons | ? | ? | ? | 0 | 0 | ? | 0 | 0 | ? | ? | ? |   |
| 1                        | 1 | 0 | 0 | 0 | 0 | 1 | 0 | 0 | 1 | 1 | 1 | 0 |
| 0                        | 0 | 0 | 1 | 1 | 1 | 1 | ? | ? | 1 | 1 | 0 | 0 |
| ?                        | 1 | 0 | ? | ? | ? | 1 | ? | ? | ? | 1 | 1 | 1 |
| 0                        | 2 | 1 | 0 | 1 | ? | ? | ? | ? | ? | 0 | 0 | 1 |
| 2                        | 0 | 0 | 0 | 0 | 0 | 0 | 0 | 1 | 0 | 1 | 1 | ? |
| ?                        | ? | ? | 0 | 0 | 1 | 1 | 0 | ? | 0 | 0 | 0 | 0 |
| ?                        | 1 | 0 | 1 | 1 | 0 | 0 | 0 | 0 | 1 | 0 | 0 | ? |
| 1                        | 1 | 0 | 0 | 0 | 0 | 1 | ? | 0 | ? | 0 | 0 | 0 |
| 1                        | 0 | 0 | 1 | ? | 0 | 1 | 0 | 0 | 0 | 1 | 0 | 1 |
| ?                        | 0 | 0 | 0 | 0 | 1 | 1 | 1 | 1 | 0 | 0 | ? | 0 |
| 1                        | 0 | 2 | 0 | 0 | ? | 0 | 0 | 1 | 2 | 0 | 0 | 1 |
| 0                        | 0 | 1 | 0 | 1 | 0 | 0 | 0 | 1 | 1 | 0 | 0 | 1 |
| ?                        | 1 | 1 | 1 | 0 | 0 | 0 | 1 | 0 | 0 | 0 | 0 | 0 |
| 0                        | 3 | ? | ? | ? | 0 | 0 | 0 | 0 | 1 |   |   |   |

|                    |   |   |   |   |   |   |   |   |   |   |   |   |   |
|--------------------|---|---|---|---|---|---|---|---|---|---|---|---|---|
| Crocodylus affinis | 0 | 0 | 1 | 0 | 0 | 1 | 0 | 0 | 1 | ? | 1 |   |   |
| 0                  | 0 | 0 | 1 | 0 | 0 | 0 | 0 | 1 | 1 | 1 | 0 | 0 |   |
| 0                  | 0 | 1 | 1 | 1 | 1 | 0 | 0 | 1 | 1 | 0 | 0 | ? |   |
| 1                  | 0 | ? | ? | ? | 1 | ? | ? | ? | 1 | 1 | 1 | 0 |   |
| 2                  | 1 | 0 | 1 | 0 | 1 | 0 | 0 | 0 | 0 | 0 | 0 | 1 | 2 |
| 0                  | 0 | 0 | 0 | 0 | 0 | 0 | 1 | 0 | 1 | 1 | 0 | 0 |   |
| ?                  | ? | 0 | 0 | 1 | 1 | 0 | ? | 0 | 0 | 0 | 0 | 0 | 1 |
| 0                  | 0 | 1 | 1 | 0 | 0 | 0 | 0 | 1 | 0 | 0 | ? | 0 |   |
| 1                  | 0 | 0 | 0 | 0 | ? | ? | 0 | ? | 0 | 0 | 0 | 0 | 1 |
| 0                  | 0 | 1 | 1 | 0 | 1 | 0 | 0 | 0 | 1 | 0 | 1 | 0 |   |
| 0                  | 0 | 0 | 0 | 1 | 1 | 1 | 1 | 0 | 0 | ? | 0 | ? |   |
| 0                  | 1 | 0 | ? | ? | 0 | 0 | 1 | 2 | 0 | 0 | 1 | 0 |   |
| 0                  | 1 | 0 | 1 | 0 | 0 | 0 | 1 | ? | ? | 0 | ? | ? |   |
| ?                  | 1 | 1 | 0 | 0 | 0 | 1 | 0 | 0 | 0 | 0 | 0 | 0 |   |
| 3                  | ? | ? | ? | 0 | 0 | 0 | 0 | 1 |   |   |   |   |   |

|                         |   |   |   |   |   |   |   |   |   |   |   |   |
|-------------------------|---|---|---|---|---|---|---|---|---|---|---|---|
| Asiatosuchus germanicus | 0 | 0 | 1 | ? | 0 | ? | 0 | ? | 0 | ? | 1 | ? |
| 0                       | 0 | 1 | 0 | 1 | 0 | ? | 0 | 1 | 0 | 1 | ? | 0 |
| 0                       | 0 | ? | 1 | 1 | 1 | 1 | ? | ? | 1 | ? | ? | 0 |
| ?                       | ? | ? | ? | ? | ? | 1 | ? | ? | ? | 1 | 1 | 1 |
| 0                       | 2 | 0 | 0 | 0 | ? | ? | ? | ? | ? | 0 | 0 | 1 |
| 2                       | 0 | 0 | 0 | 0 | ? | ? | 0 | 1 | 0 | 1 | ? | 0 |
| 0                       | ? | ? | 0 | 0 | 0 | 1 | 0 | ? | 0 | 0 | 0 | 0 |
| ?                       | 0 | 0 | 0 | 1 | 0 | 0 | 0 | 0 | 1 | 0 | ? | ? |
| ?                       | 1 | 0 | 0 | 0 | 0 | ? | ? | 0 | ? | 0 | 0 | 0 |
| 1                       | 0 | ? | ? | ? | 0 | 1 | 0 | 0 | 0 | 1 | 0 | 1 |
| 0                       | 0 | 0 | 0 | ? | 1 | 1 | 1 | 1 | 0 | 0 | ? | ? |
| ?                       | 0 | 1 | 0 | 0 | ? | 0 | 0 | 1 | 1 | 1 | 0 | 1 |
| 0                       | 0 | 1 | 0 | 1 | 0 | 0 | 0 | ? | ? | ? | ? | ? |
| ?                       | ? | 1 | 1 | 0 | 0 | ? | 1 | 0 | 0 | 0 | 0 | 0 |
| 0                       | 3 | ? | ? | ? | 0 | 0 | 0 | 0 | 1 |   |   |   |

|                       |   |   |   |   |   |   |   |   |   |   |   |   |
|-----------------------|---|---|---|---|---|---|---|---|---|---|---|---|
| Prodiplocynodon langi | ? | ? | ? | ? | ? | ? | ? | ? | ? | ? | ? | ? |
| ?                     | ? | ? | ? | ? | ? | ? | ? | ? | ? | ? | ? | ? |
| ?                     | ? | ? | ? | ? | ? | ? | ? | ? | ? | ? | ? | ? |
| ?                     | ? | ? | ? | ? | ? | ? | ? | ? | ? | ? | ? | ? |
| ?                     | ? | ? | ? | ? | ? | ? | ? | ? | ? | ? | ? | ? |
| ?                     | ? | 0 | 0 | 1 | 1 | 0 | ? | 0 | 0 | 0 | 0 | ? |
| ?                     | 0 | 0 | 3 | 0 | 0 | 0 | 0 | 1 | 0 | 0 | ? | ? |
| 1                     | 0 | 0 | 0 | 0 | 1 | ? | ? | 0 | 0 | 0 | 0 | 1 |
| 0                     | 0 | 1 | 1 | ? | 1 | 0 | 0 | 0 | 1 | 0 | 1 | ? |
| ?                     | ? | 0 | ? | 1 | 1 | 1 | 1 | 0 | 0 | ? | ? | ? |
| 0                     | ? | 0 | ? | ? | 0 | ? | 1 | 1 | ? | 0 | 1 | 0 |
| ?                     | 1 | 0 | 1 | 0 | 0 | 0 | 1 | ? | ? | 0 | 1 | ? |
| 0                     | 1 | 1 | 0 | 0 | 1 | 1 | 0 | 0 | 0 | 0 | 0 | 0 |
| 3                     | ? | ? | ? | 0 | 0 | 0 | 0 | ? |   |   |   |   |

| Crocodylus checchiai | MPURLS | LIBYA |   |   |   |   |   |   |   |   |   |   |   |
|----------------------|--------|-------|---|---|---|---|---|---|---|---|---|---|---|
| ?                    | ?      | ?     | ? | ? | ? | ? | ? | ? | ? | ? | ? | ? | ? |
| ?                    | ?      | ?     | ? | ? | ? | ? | ? | ? | ? | ? | ? | ? | ? |
| ?                    | ?      | ?     | ? | ? | ? | ? | ? | ? | ? | ? | ? | ? | ? |
| ?                    | ?      | ?     | ? | ? | ? | ? | ? | ? | ? | ? | ? | ? | ? |
| ?                    | ?      | ?     | ? | ? | ? | ? | ? | ? | ? | ? | ? | ? | ? |
| ?                    | ?      | ?     | ? | 0 | 0 | 1 | 1 | 0 | ? | 0 | 0 | 0 | 0 |
| 0                    | 1      | 0     | 0 | 2 | 1 | 0 | 1 | 0 | 0 | 1 | 0 | 0 | 0 |
| ?                    | 1      | 0     | 0 | 0 | 0 | 0 | 1 | 1 | 0 | 1 | 0 | 0 | 0 |
| 1                    | 0      | 0     | 0 | 1 | 1 | 0 | 1 | 0 | 0 | 0 | ? | 0 | 0 |
| ?                    | 0      | 0     | 0 | 0 | 0 | 1 | 1 | 1 | 1 | 1 | 0 | ? | ? |
| ?                    | ?      | 1     | 0 | 1 | 0 | 1 | 0 | 0 | 1 | 2 | 0 | 0 | 0 |
| 1                    | 0      | 0     | 1 | 0 | 1 | 0 | 0 | ? | 1 | 1 | 1 | 0 | 0 |
| 1                    | 0      | 1     | 1 | ? | ? | 0 | 0 | 1 | 1 | 0 | 0 | 0 | 0 |
| 0                    | 0      | 3     | ? | ? | ? | 0 | 0 | ? | 0 | ? |   |   |   |
