# Supplementary material for: Old African fossils provide new evidence for the origin of the American crocodiles
Source: PubMed Central journal article supplement (PMC7378212; doi:10.1038/s41598-020-68482-5), 2020-07-23
Supplement: 41598_2020_68482_MOESM2_ESM.pdf [file 41598_2020_68482_MOESM2_ESM.pdf]

# Supplementary Data File

## Old African fossils provide new evidence for the origin of the American crocodiles

Massimo Delfino, Dawid A. Iurino, Bruno Mercurio, Paolo Piras, Lorenzo Rook & Raffaele Sardella

### Matrix Scheyer et al with *C. checchiae* Libya

|                         |   |   |   |   |   |     |   |   |   |   |   |   |
|-------------------------|---|---|---|---|---|-----|---|---|---|---|---|---|
| Crocodylus megarhinus?  | ? | ? | ? | ? | ? | ?   | ? | 0 | ? | ? | ? |   |
| ?                       | 1 | 0 | 0 | 0 | 0 | 0   | 0 | 1 | 0 | 2 | 1 | 0 |
| 0                       | ? | 1 | 0 | 0 | ? | 0   | 0 |   |   |   |   |   |
| Crocodylus pigotti      | ? | ? | 0 | 0 | ? | ?   | 0 | 0 | 1 | 1 | ? |   |
| ?                       | 1 | ? | 0 | 1 | 0 | 1   | 1 | 1 | 1 | ? | ? | 0 |
| 1                       | 0 | ? | 1 | 0 | 0 | 1   | 1 |   |   |   |   |   |
| Rimasuchus lloydi       | ? | ? | ? | ? | ? | ?   | ? | ? | ? | ? | ? | ? |
| ?                       | ? | ? | 0 | 1 | ? | 0   | 0 | ? | ? | 1 | 1 | 0 |
| 1                       | 0 | 1 | 1 | 0 | ? | 0   | 0 |   |   |   |   |   |
| Voay robustus           | ? | ? | ? | ? | ? | ?   | ? | ? | ? | ? | 1 | 1 |
| 1                       | 0 | 0 | 1 | 0 | 0 | 0   | 1 | 2 | 0 | 1 | 1 | 1 |
| 1                       | ? | 1 | 0 | 0 | 0 | 1   |   |   |   |   |   |   |
| Mecistops cataphractus  | 1 | 0 | 0 | 0 | 0 | 0   | 0 | 0 | 0 | 0 | 1 | 1 |
| 2                       | 0 | 1 | 1 | 0 | 0 | 0   | 0 | 1 | 1 | 1 | 0 | 1 |
| 0                       | 0 | 0 | 1 | 1 | 0 | 0   | 1 | 0 |   |   |   |   |
| Crocodylus palaeindicus | ? | ? | ? | ? | ? | ?   | ? | ? | ? | ? | ? | ? |
| ?                       | ? | 0 | 1 | 0 | 0 | 0   | 1 | 0 | 0 | 1 | 0 | 1 |
| 0                       | 0 | 1 | 0 | 1 | 1 | ?   | 1 | ? |   |   |   |   |
| Crocodylus porosus      | 1 | 1 | 0 | 0 | 1 | 1   | 0 | 1 | 0 | 1 | 0 | 2 |
| 0                       | 0 | 1 | 0 | 1 | 1 | 0/1 | 0 | 1 | 1 | 0 | 1 | 0 |
| 0                       | 0 | 1 | 1 | 1 | 1 | 0   | 1 |   |   |   |   |   |

|                            |   |   |   |   |   |   |     |     |   |   |   |   |   |
|----------------------------|---|---|---|---|---|---|-----|-----|---|---|---|---|---|
| Crocodylus palustris       | 1 | 0 | 0 | 0 | 1 | 0 | 1   | 1   | 1 | 1 | 1 | 2 |   |
|                            | 1 | 0 | 1 | 0 | 1 | 1 | 0/1 | 0   | 1 | 1 | 0 | 1 | 0 |
|                            | 0 | 0 | 1 | 1 | 1 | 1 | 0   | 1   |   |   |   |   |   |
| Crocodylus siamensis       | 1 | 1 | 1 | 1 | 1 | 0 | 0   | 0   | 0 | 1 | 0 | 2 |   |
|                            | 0 | 0 | 1 | 0 | 1 | 1 | 0/1 | 0   | 1 | 1 | 0 | 1 | 1 |
|                            | 0 | 0 | 1 | 1 | 1 | 1 | 0   | 0   |   |   |   |   |   |
| Crocodylus johnstoni       | 1 | 1 | 0 | 0 | 1 | 1 | 0   | 1   | 0 | 1 | 0 | 2 |   |
|                            | 0 | ? | 1 | 0 | 1 | 1 | 0/1 | 1   | 1 | 0 | 0 | 1 | 0 |
|                            | 0 | 0 | 1 | 1 | 1 | 0 | 0   | 0   |   |   |   |   |   |
| Crocodylus mindorensis     |   | 1 | 1 | 0 | 0 | 1 | 1   | 0   | 1 | 0 | 1 | 0 | 1 |
|                            | 2 | 0 | 0 | 1 | 0 | 1 | 1   | 0/1 | 0 | 1 | 1 | 0 | 1 |
|                            | 0 | 0 | 0 | 1 | 1 | 1 | 1   | 1   | 0 |   |   |   |   |
| Crocodylus novaeguineae    |   | 1 | 1 | 0 | 0 | 1 | 1   | 0   | 1 | 0 | 1 | 0 | 1 |
|                            | 2 | 0 | 0 | 1 | 0 | 1 | 1   | 0/1 | 0 | 1 | 1 | 0 | 0 |
|                            | 0 | 0 | 0 | 1 | 0 | 1 | 0   | 0   | 0 |   |   |   |   |
| Crocodylus niloticus       | 1 | 0 | 1 | 0 | 1 | 0 | 0   | 0   | 1 | 1 | 1 | 2 |   |
|                            | 0 | 0 | 1 | 0 | 0 | 1 | 0/1 | 0   | 1 | 1 | 1 | 1 | 0 |
|                            | 0 | 0 | 1 | 1 | 1 | 0 | 0   | 0   |   |   |   |   |   |
| Crocodylus falconensis     | ? | ? | ? | ? | ? | ? | ?   | ?   | ? | ? | ? | ? | ? |
|                            | ? | 0 | 1 | 1 | 0 | 1 | 0   | 0   | 0 | ? | 1 | ? | 0 |
|                            | 0 | ? | ? | ? | ? | 0 | ?   | 0   |   |   |   |   |   |
| Crocodylus acutus          | 0 | 0 | 1 | 0 | 1 | 0 | 0   | 0   | 1 | 1 | 1 | 2 |   |
|                            | 0 | 0 | 1 | 1 | 0 | 1 | 0/1 | 0   | 0 | 1 | 1 | 1 | 0 |
|                            | 0 | 0 | 1 | 1 | 1 | 1 | 1   | 1   |   |   |   |   |   |
| Crocodylus intermedius     | 0 | 0 | 1 | 0 | 1 | 0 | 0   | 0   | 1 | 1 | 1 | 2 |   |
|                            | 0 | 1 | 1 | 1 | 0 | 1 | 0/1 | 0   | 0 | 1 | 0 | 1 | 0 |
|                            | 0 | 0 | 1 | 1 | 1 | 1 | 1   | 1   |   |   |   |   |   |
| Crocodylus moreletii       | 0 | 0 | 1 | 0 | 1 | 0 | 0   | 0   | 1 | 1 | 1 | 2 |   |
|                            | 0 | 0 | 1 | 1 | 0 | 1 | 0/1 | 0   | 0 | 1 | 1 | 1 | 0 |
|                            | 0 | 0 | 1 | 1 | 1 | 1 | 1   | 0   |   |   |   |   |   |
| Crocodylus rhombifer       | 0 | 0 | 1 | 0 | 1 | 0 | 0   | 0   | 1 | 1 | 1 | 1 |   |
|                            | 0 | 0 | 1 | 1 | 0 | 1 | 0/1 | 0   | 0 | 1 | 1 | 1 | 1 |
|                            | 0 | 0 | 1 | 1 | 1 | 1 | 1   | 0   |   |   |   |   |   |
| Crocodylus checchiai LIBYA | ? | ? | ? | ? | ? | ? | ?   | ?   | ? | ? | ? | ? | ? |
|                            | ? | ? | ? | ? | 1 | 0 | ?   | 1   | 0 | 1 | 1 | 0 | 0 |
|                            | 0 | 0 | 0 | 1 | 1 | 1 | 1   | 1   | 0 |   |   |   |   |
